# Supplementary material
Source: PubMed Central journal article supplement (PMC4435588)
Supplement: mt201469x6.pdf [file mt201469x6.pdf]

Supplementary Table 1 Primer pairs and probes for rabbit mRNA expression analysis by real time RT-PCR.

|         | Forward primer (5' to 3')      | Reverse primer (5' to 3') | Taqman® MGB probe (5' to 3') |
|---------|--------------------------------|---------------------------|------------------------------|
| K6      | AGGACTACAAGAAGAAATATGAAGATGAAA | CACGTCCTTCTTCAGAGTCACAA   | CAACAAGCGCACGGC              |
| TSP1    | GTGATGTGACAGAAAACCAGATCTG      | CCGGCAAAGCAGGGATT         | CAATCGATGGATGTCTGTC          |
| K14     | CGGCGCTCCGTACAGAAC             | TGCAGTAGCGGCCTTTGG        | CTCAGCATGAAAGCAT             |
| ΔNp63   | CCTGGAAAACAATGCCCAGACT         | AGGAGCCCCAGGTTTCGT        | TACTGTGGCTCACTAAATT          |
| β actin | CCTGACCGACTACCTCATGAAG         | GCCATCTCCTGCTCGAAGT       | CGAGATCGTGCGGGACATCA         |
