# Supplementary material
Source: PubMed Central journal article supplement (PMC4435588)
Supplement: mt201469x7.pdf [file mt201469x7.pdf]

Supplemental Materials for

**Evidence of the survival of ectopically transplanted oral mucosal epithelial stem cells after repeated wounding of rabbit cornea**

Hiroaki Sugiyama, Masayuki Yamato, Kohji Nishida, and Teruo Okano

**MATERIALS AND METHODS**

*Evaluation of rabbit limbal stem cell deficiency (LSCD) model by immunohistochemical analysis*

An oral mucosal epithelial cell sheet was transplanted on the conjunctival and subconjunctival scar tissue of LSCD model. The pannus of the LSCD model was excised and embedded in optimum cutting temperature (OCT) compound and processed to be frozen sections. These sections were stained with cytokeratin 4 (K4) and cytokeratin 13 (K13), conjunctival cell markers, and mucin 5 (Muc5), a goblet cell marker. These markers were observed in the cornea surface of all three rabbit LSCD models (Supplementary Fig. 1).
