# Supplementary material
Source: PubMed Central journal article supplement (PMC4435588)

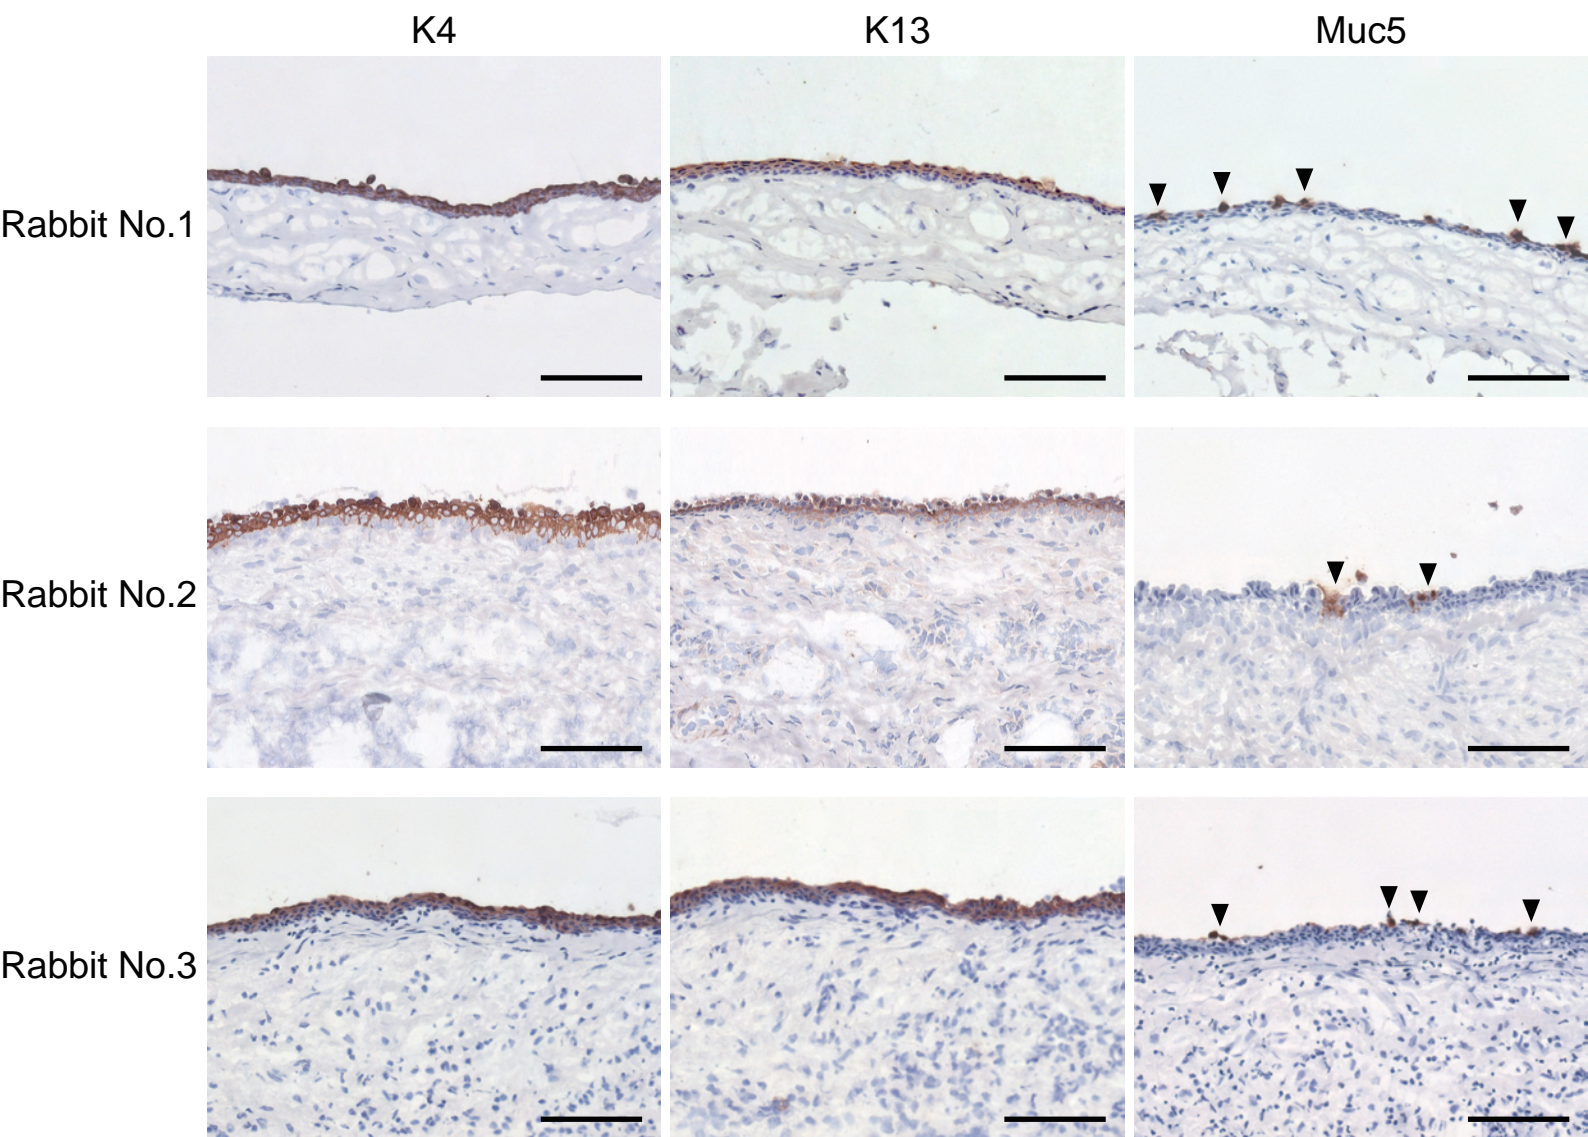

Figure S1. Sugiyama, et al.

Supplement: mt201469x1.pdf [file mt201469x1.pdf]

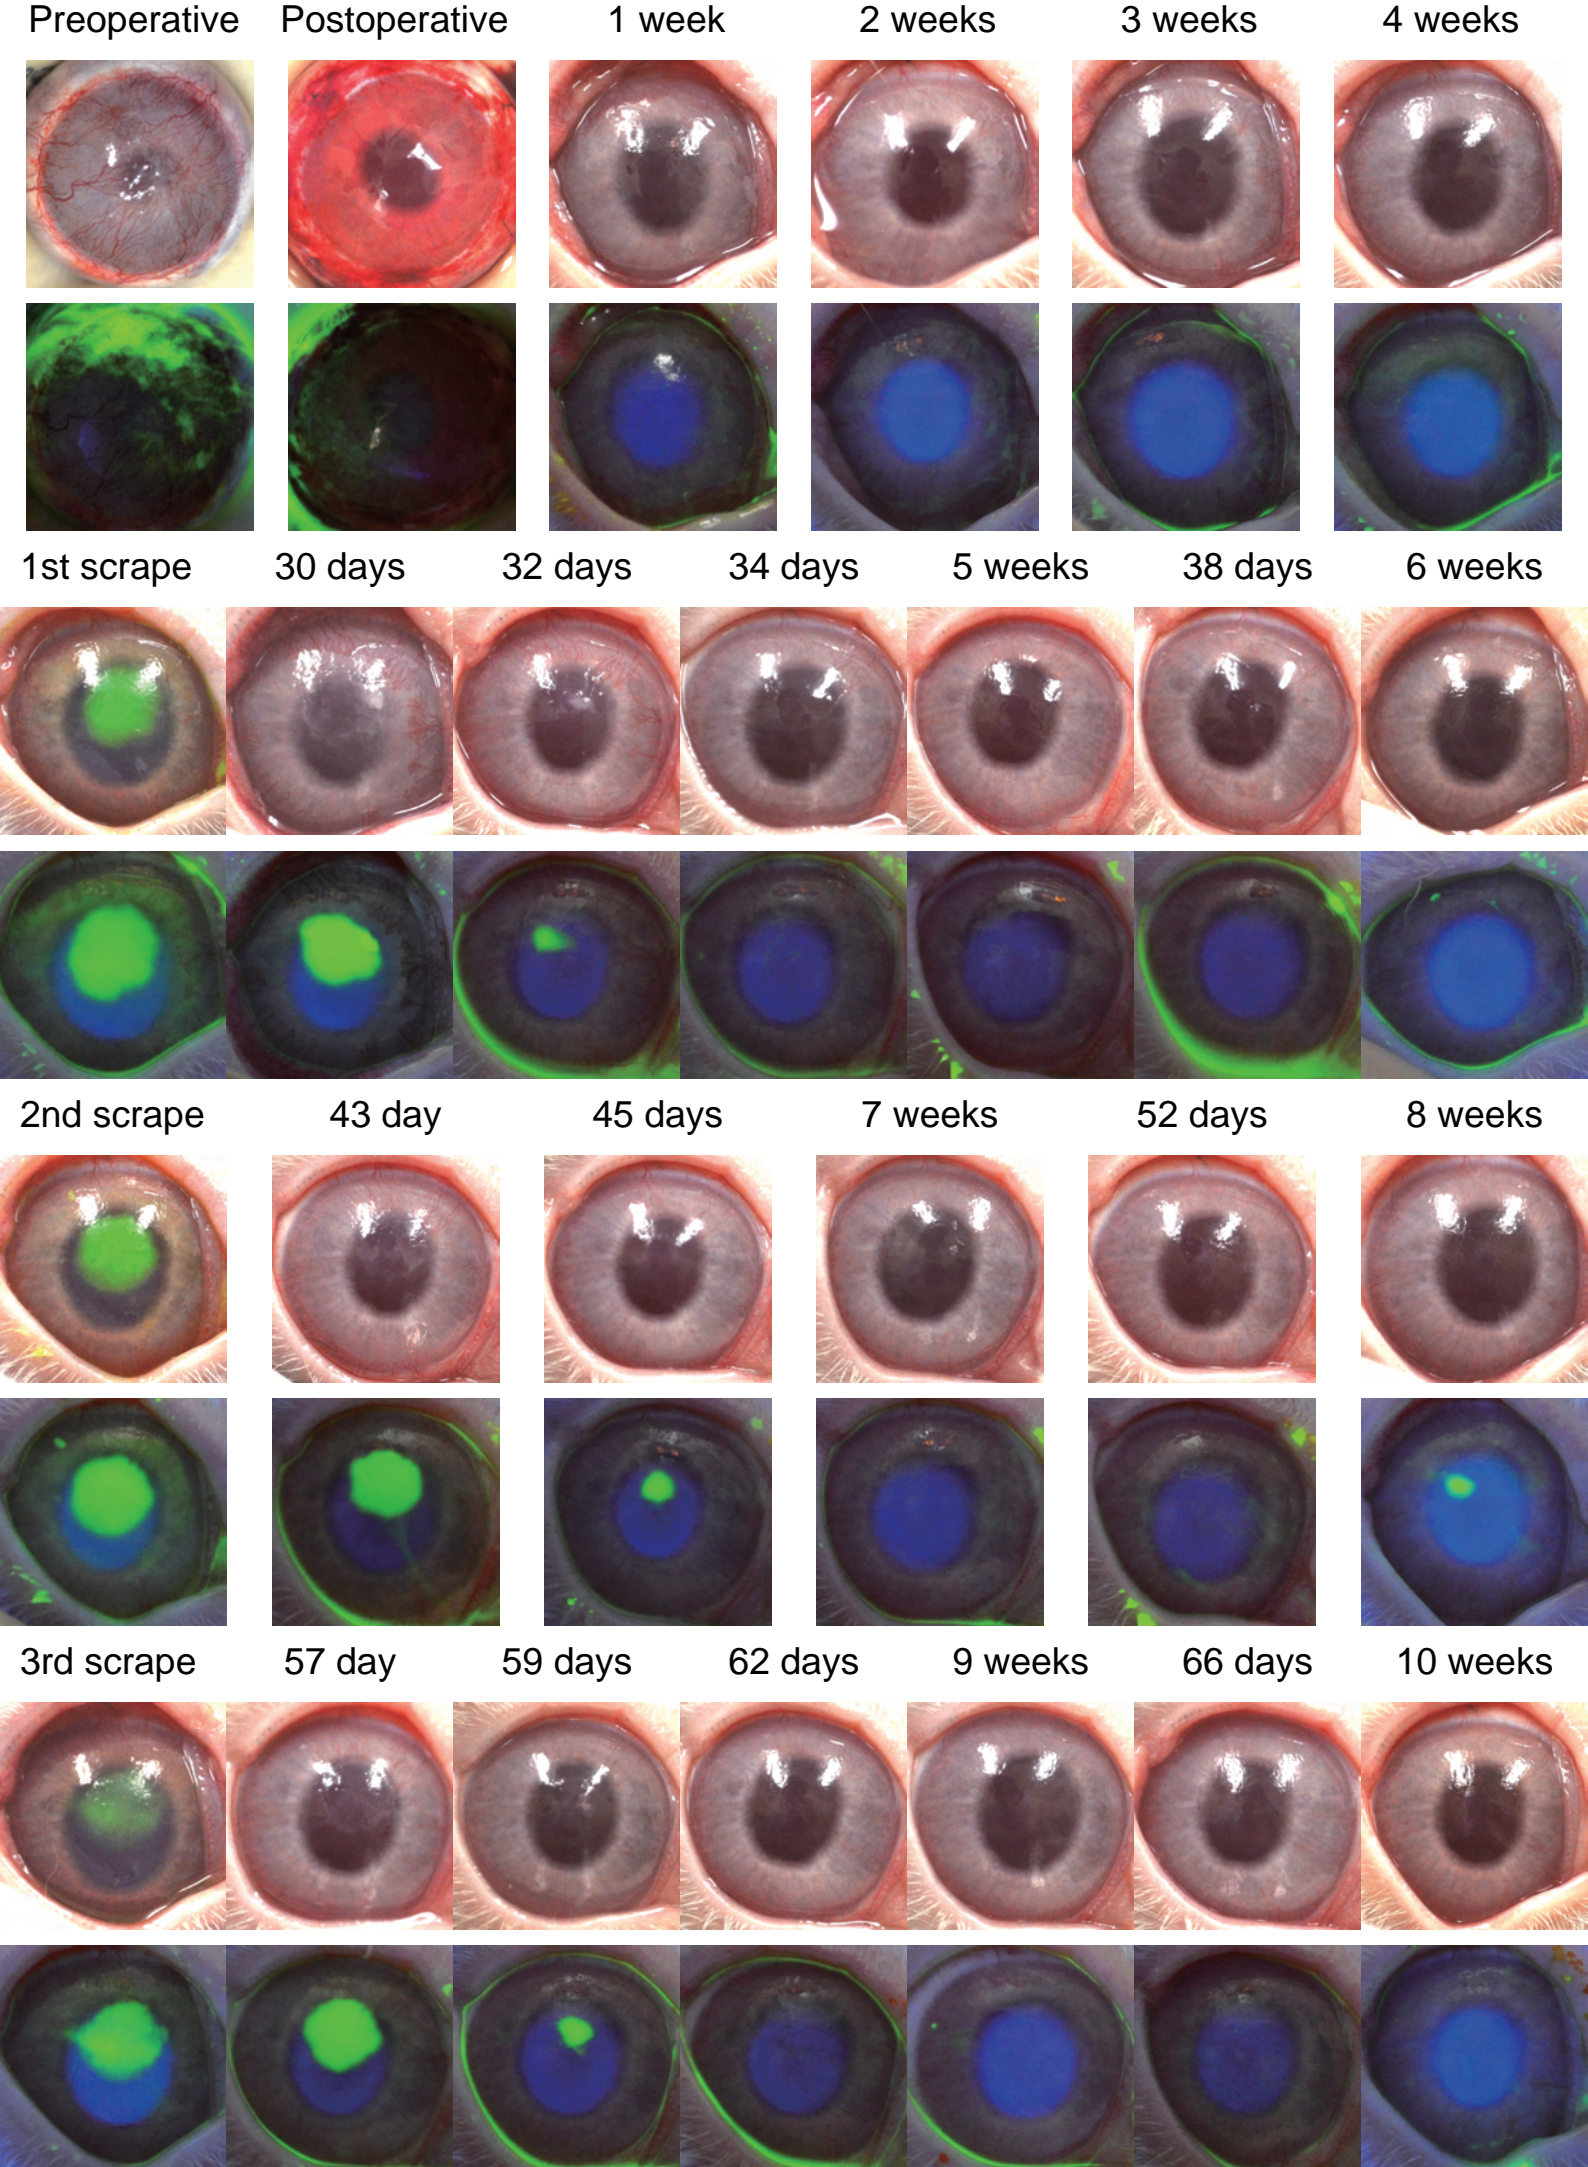

Figure S2A. Sugiyama, et al.



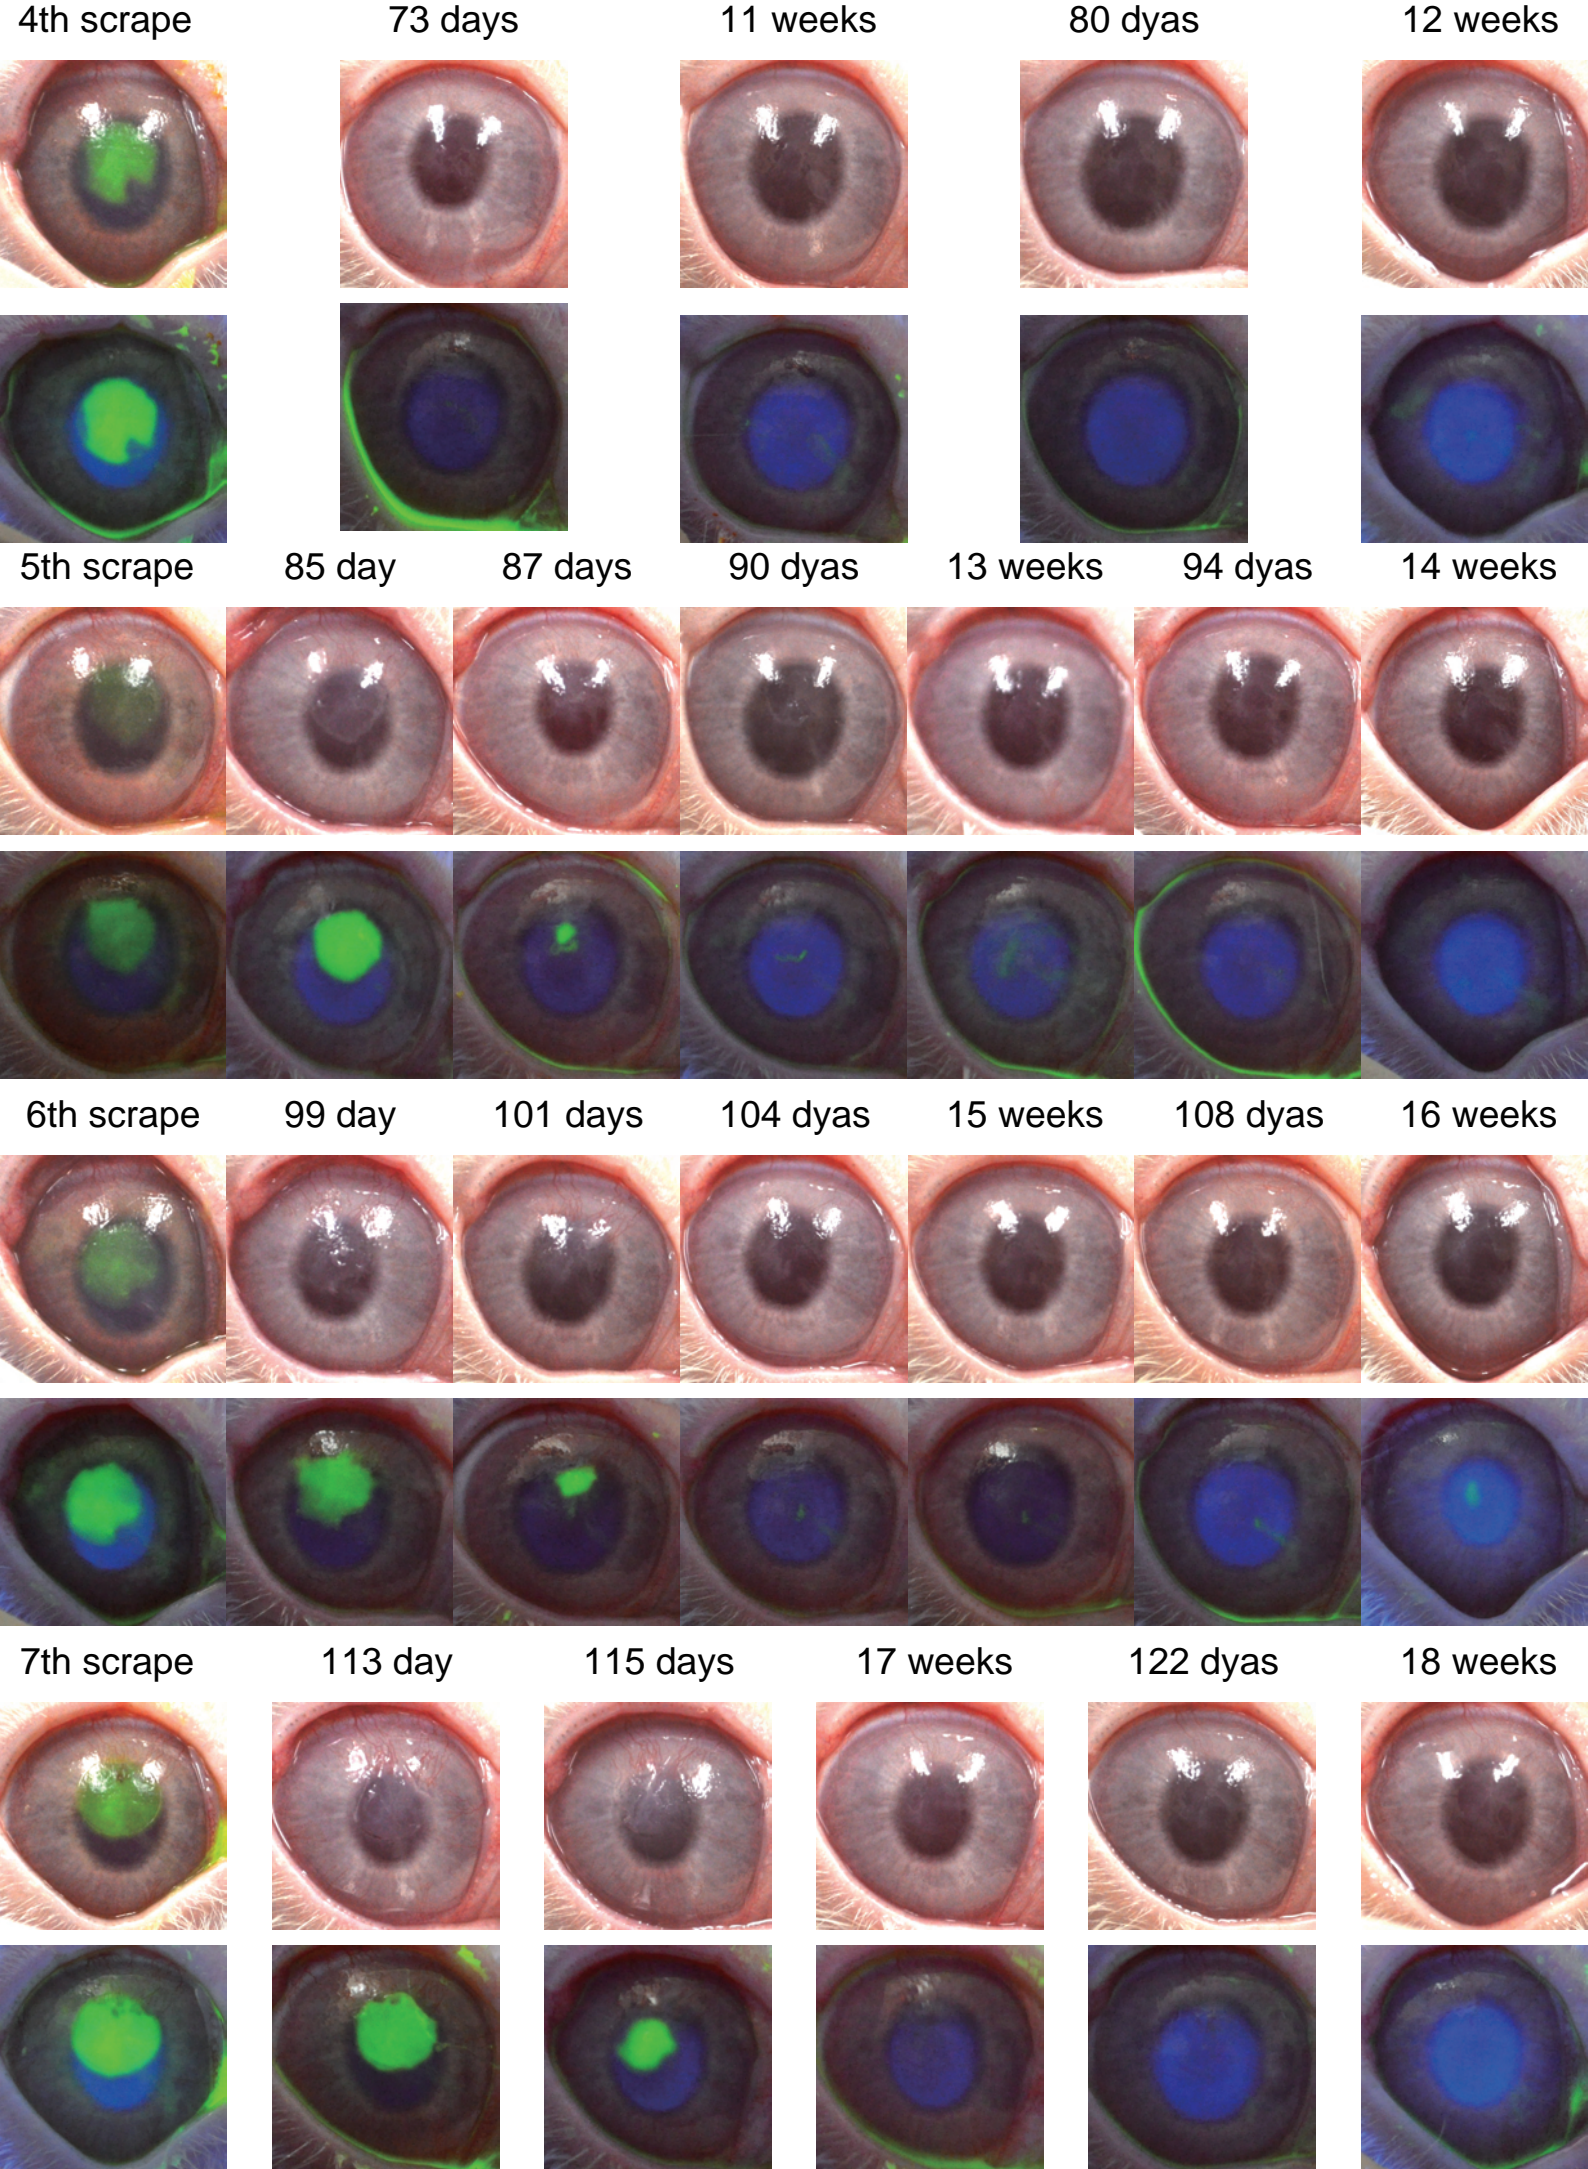

Figure S2B. Sugiyama, et al.



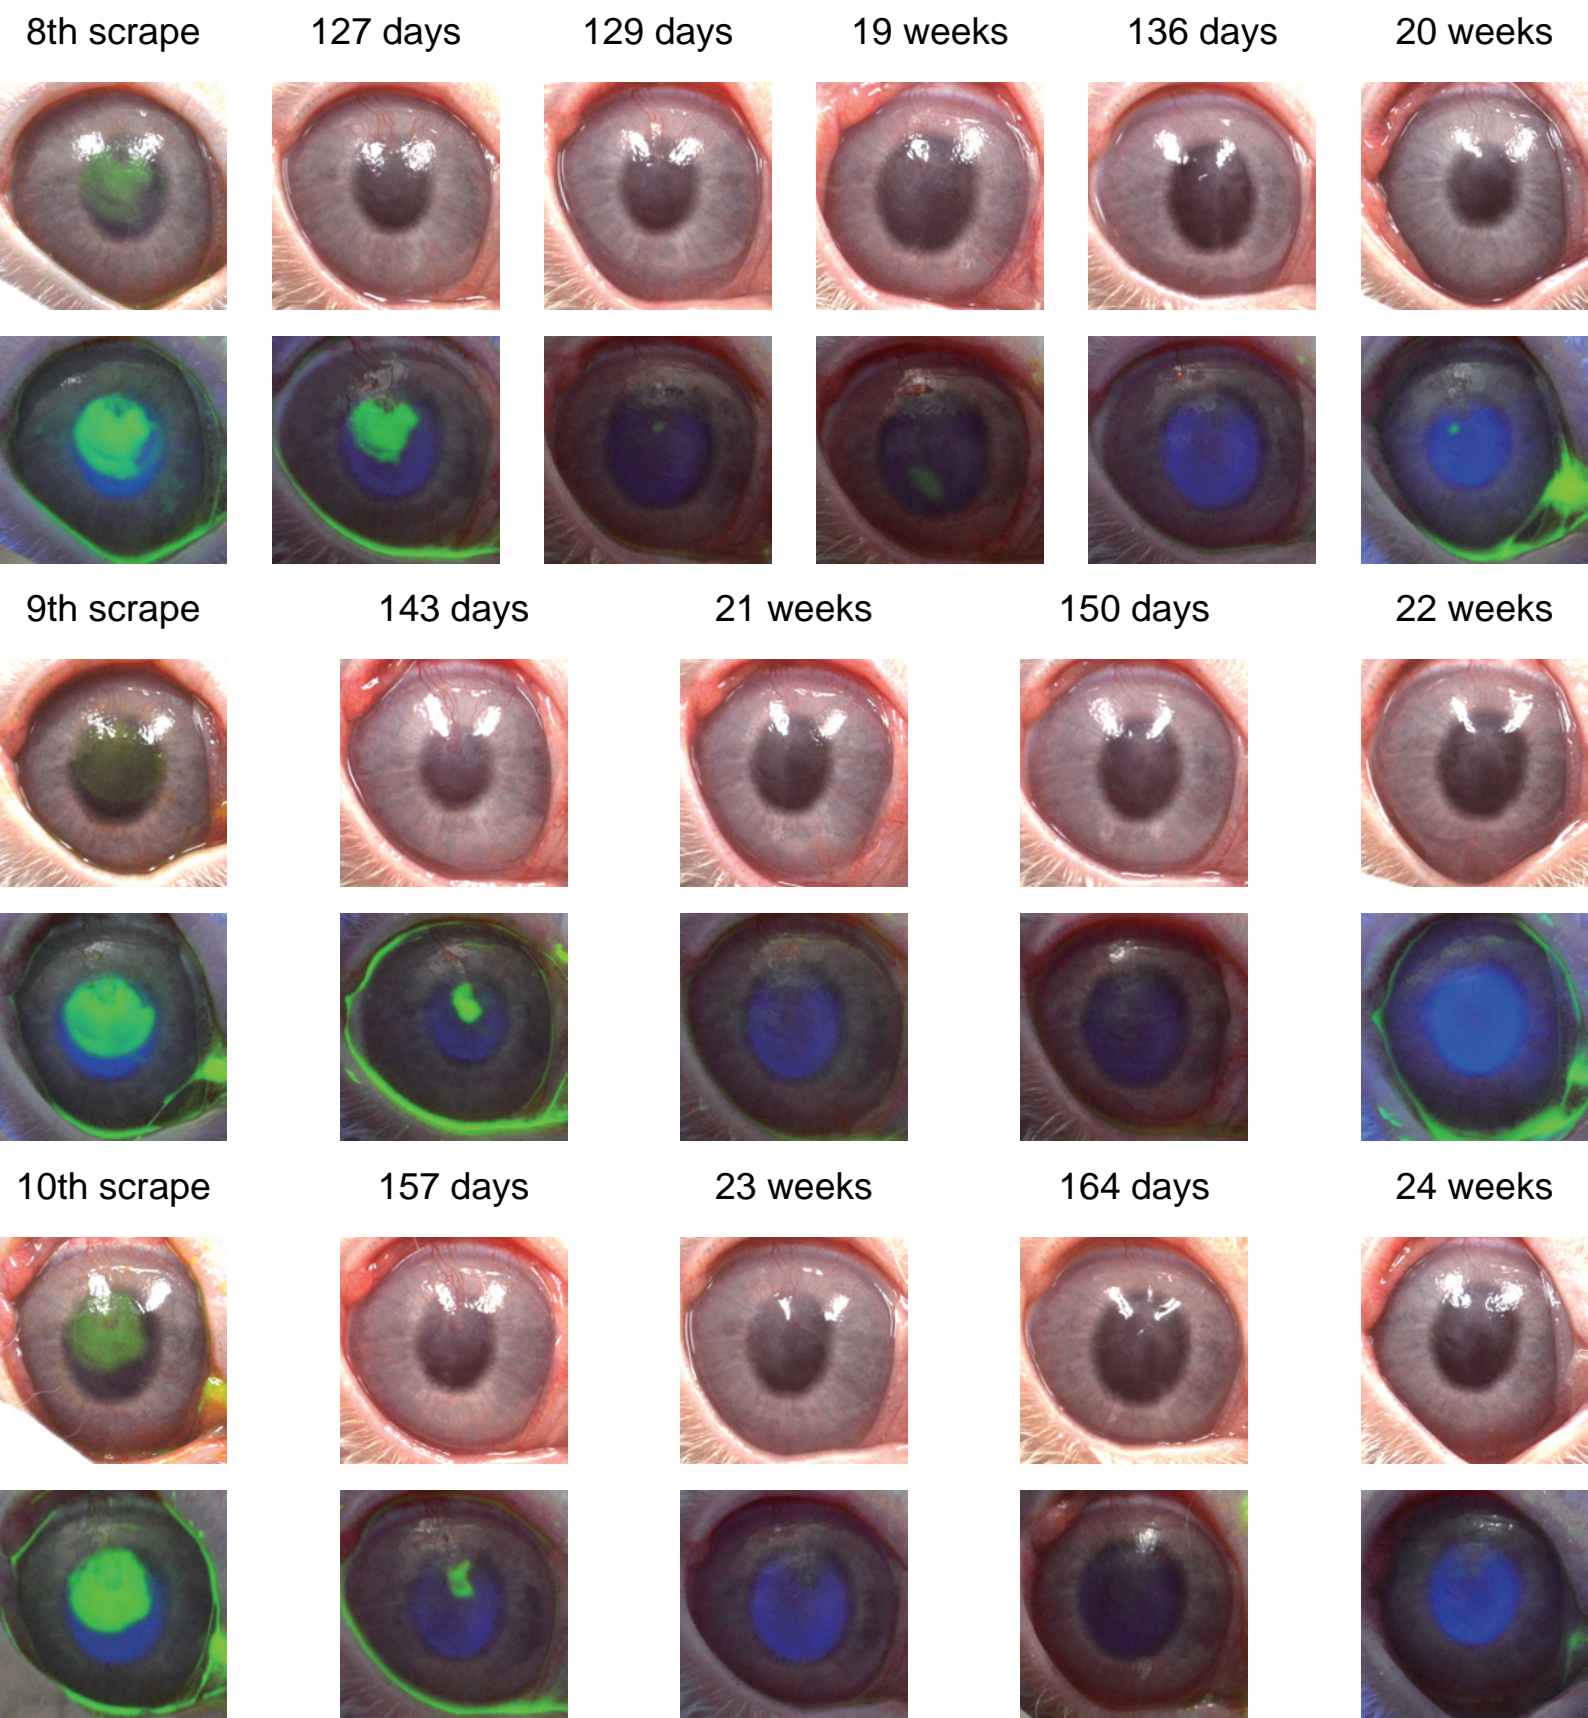

Figure S2C. Sugiyama, et al.

Supplement: mt201469x2.pdf [file mt201469x2.pdf]

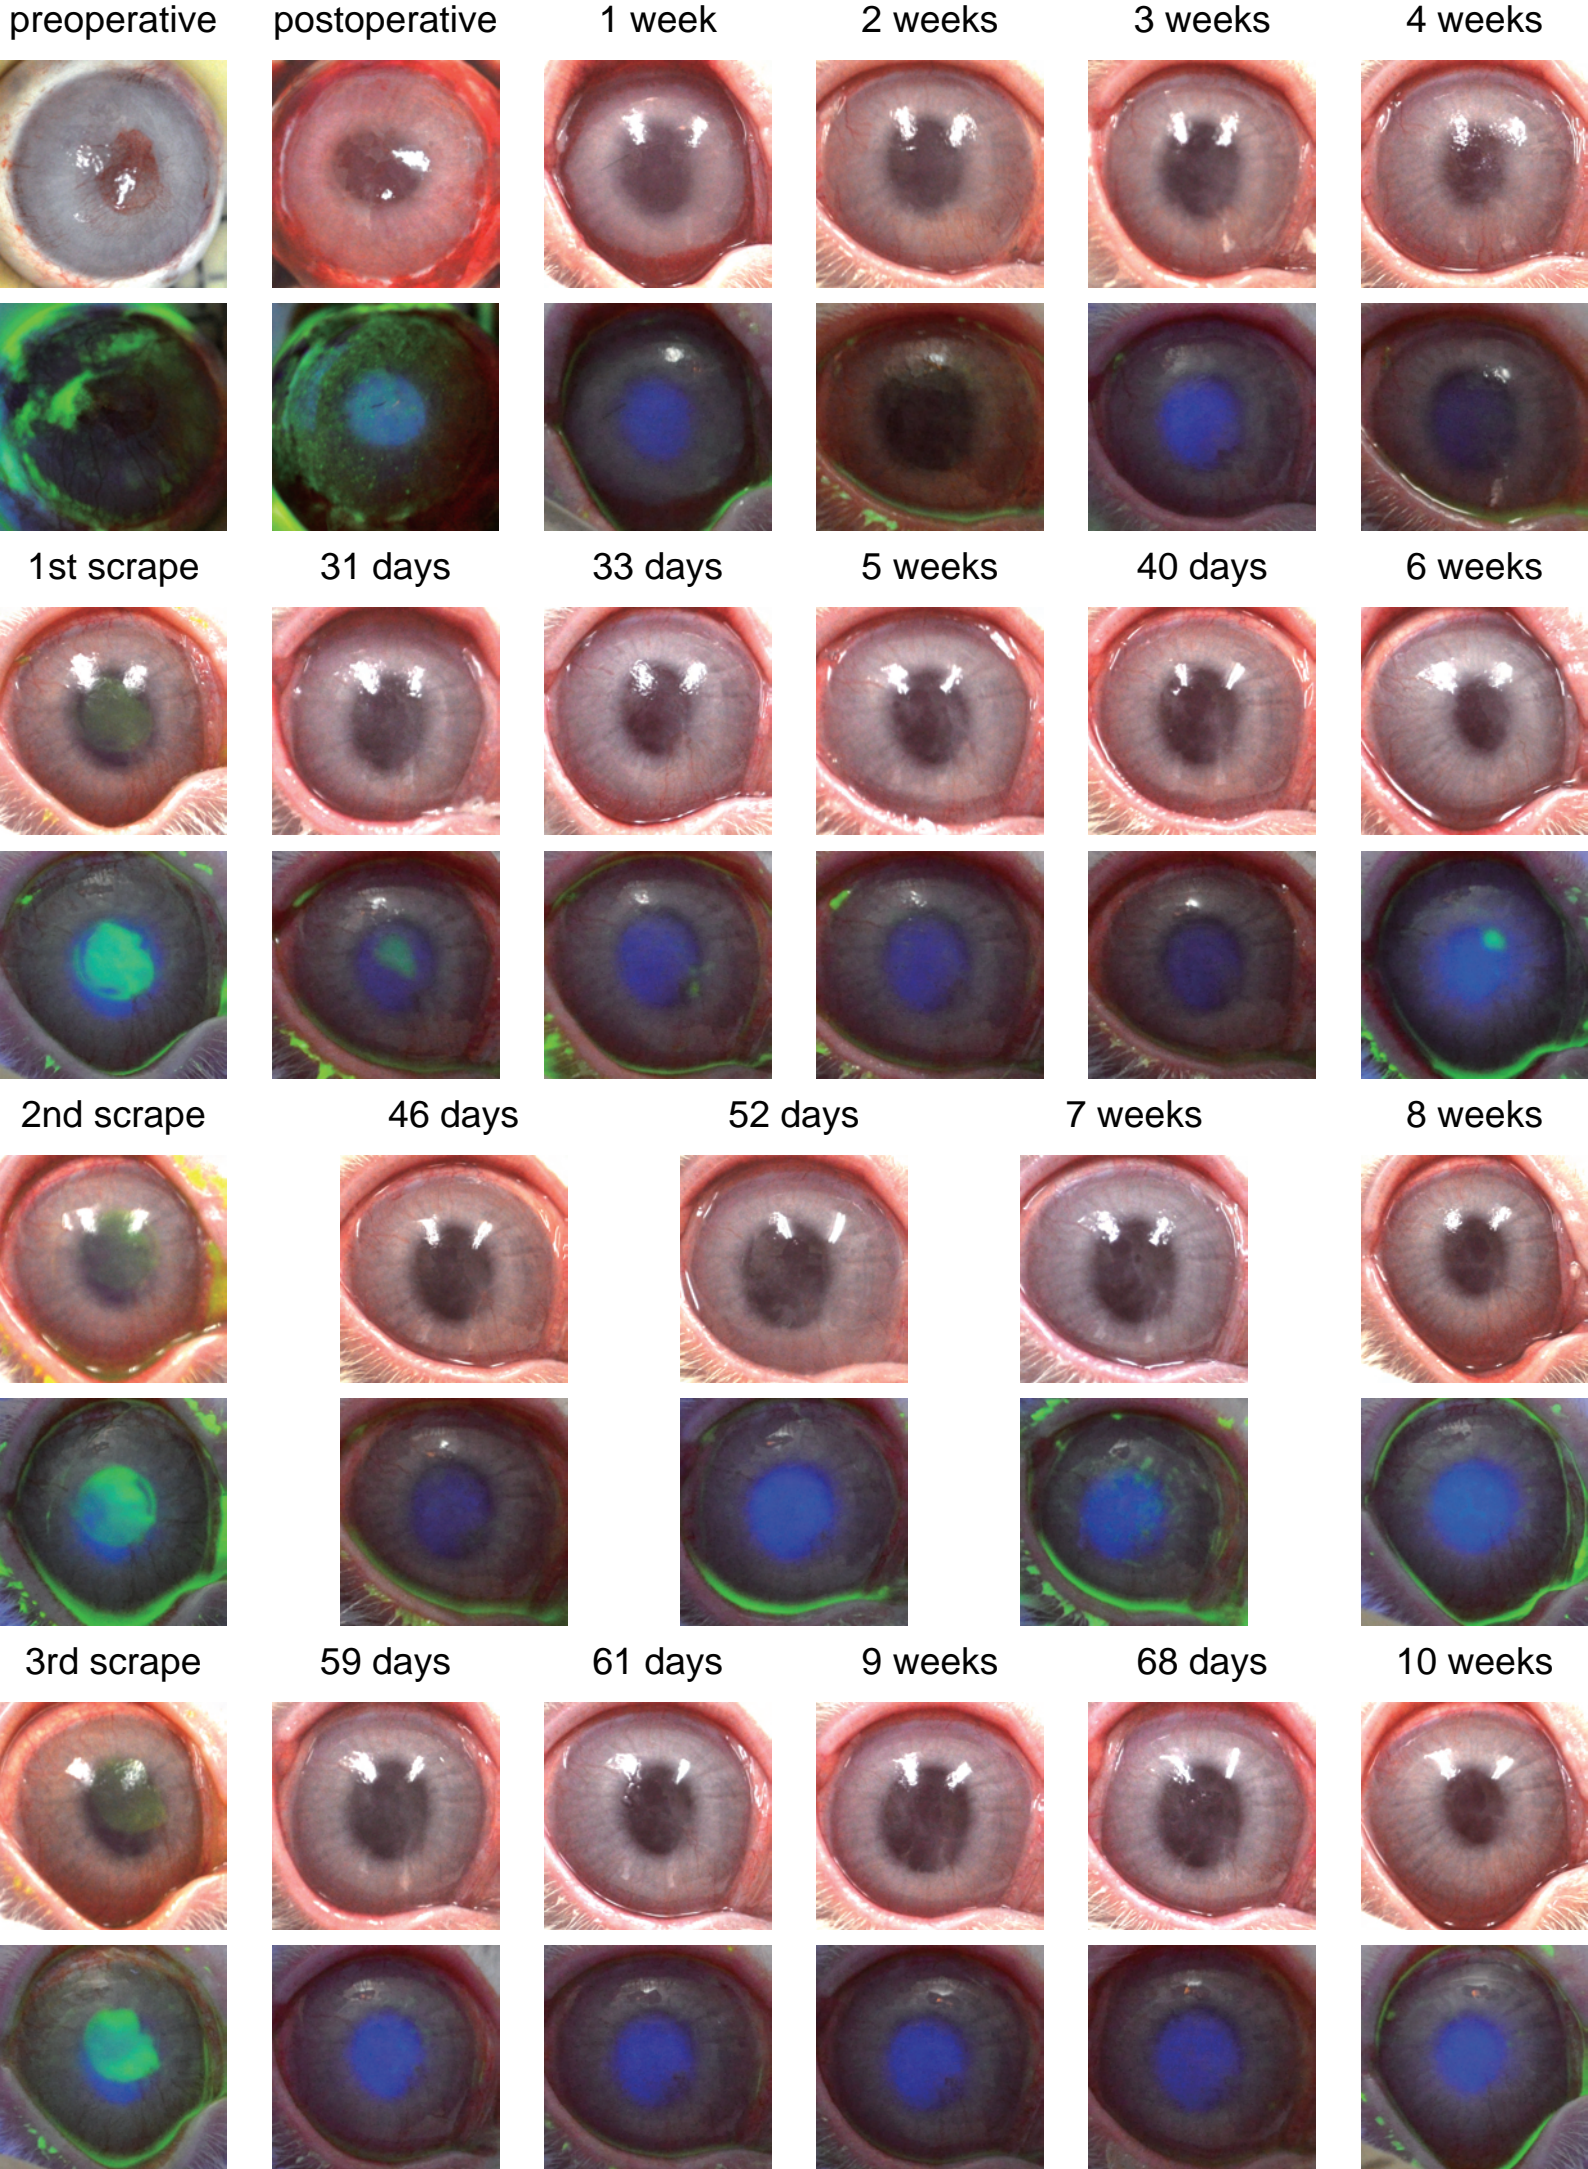

Figure S3A. Sugiyama, et al.



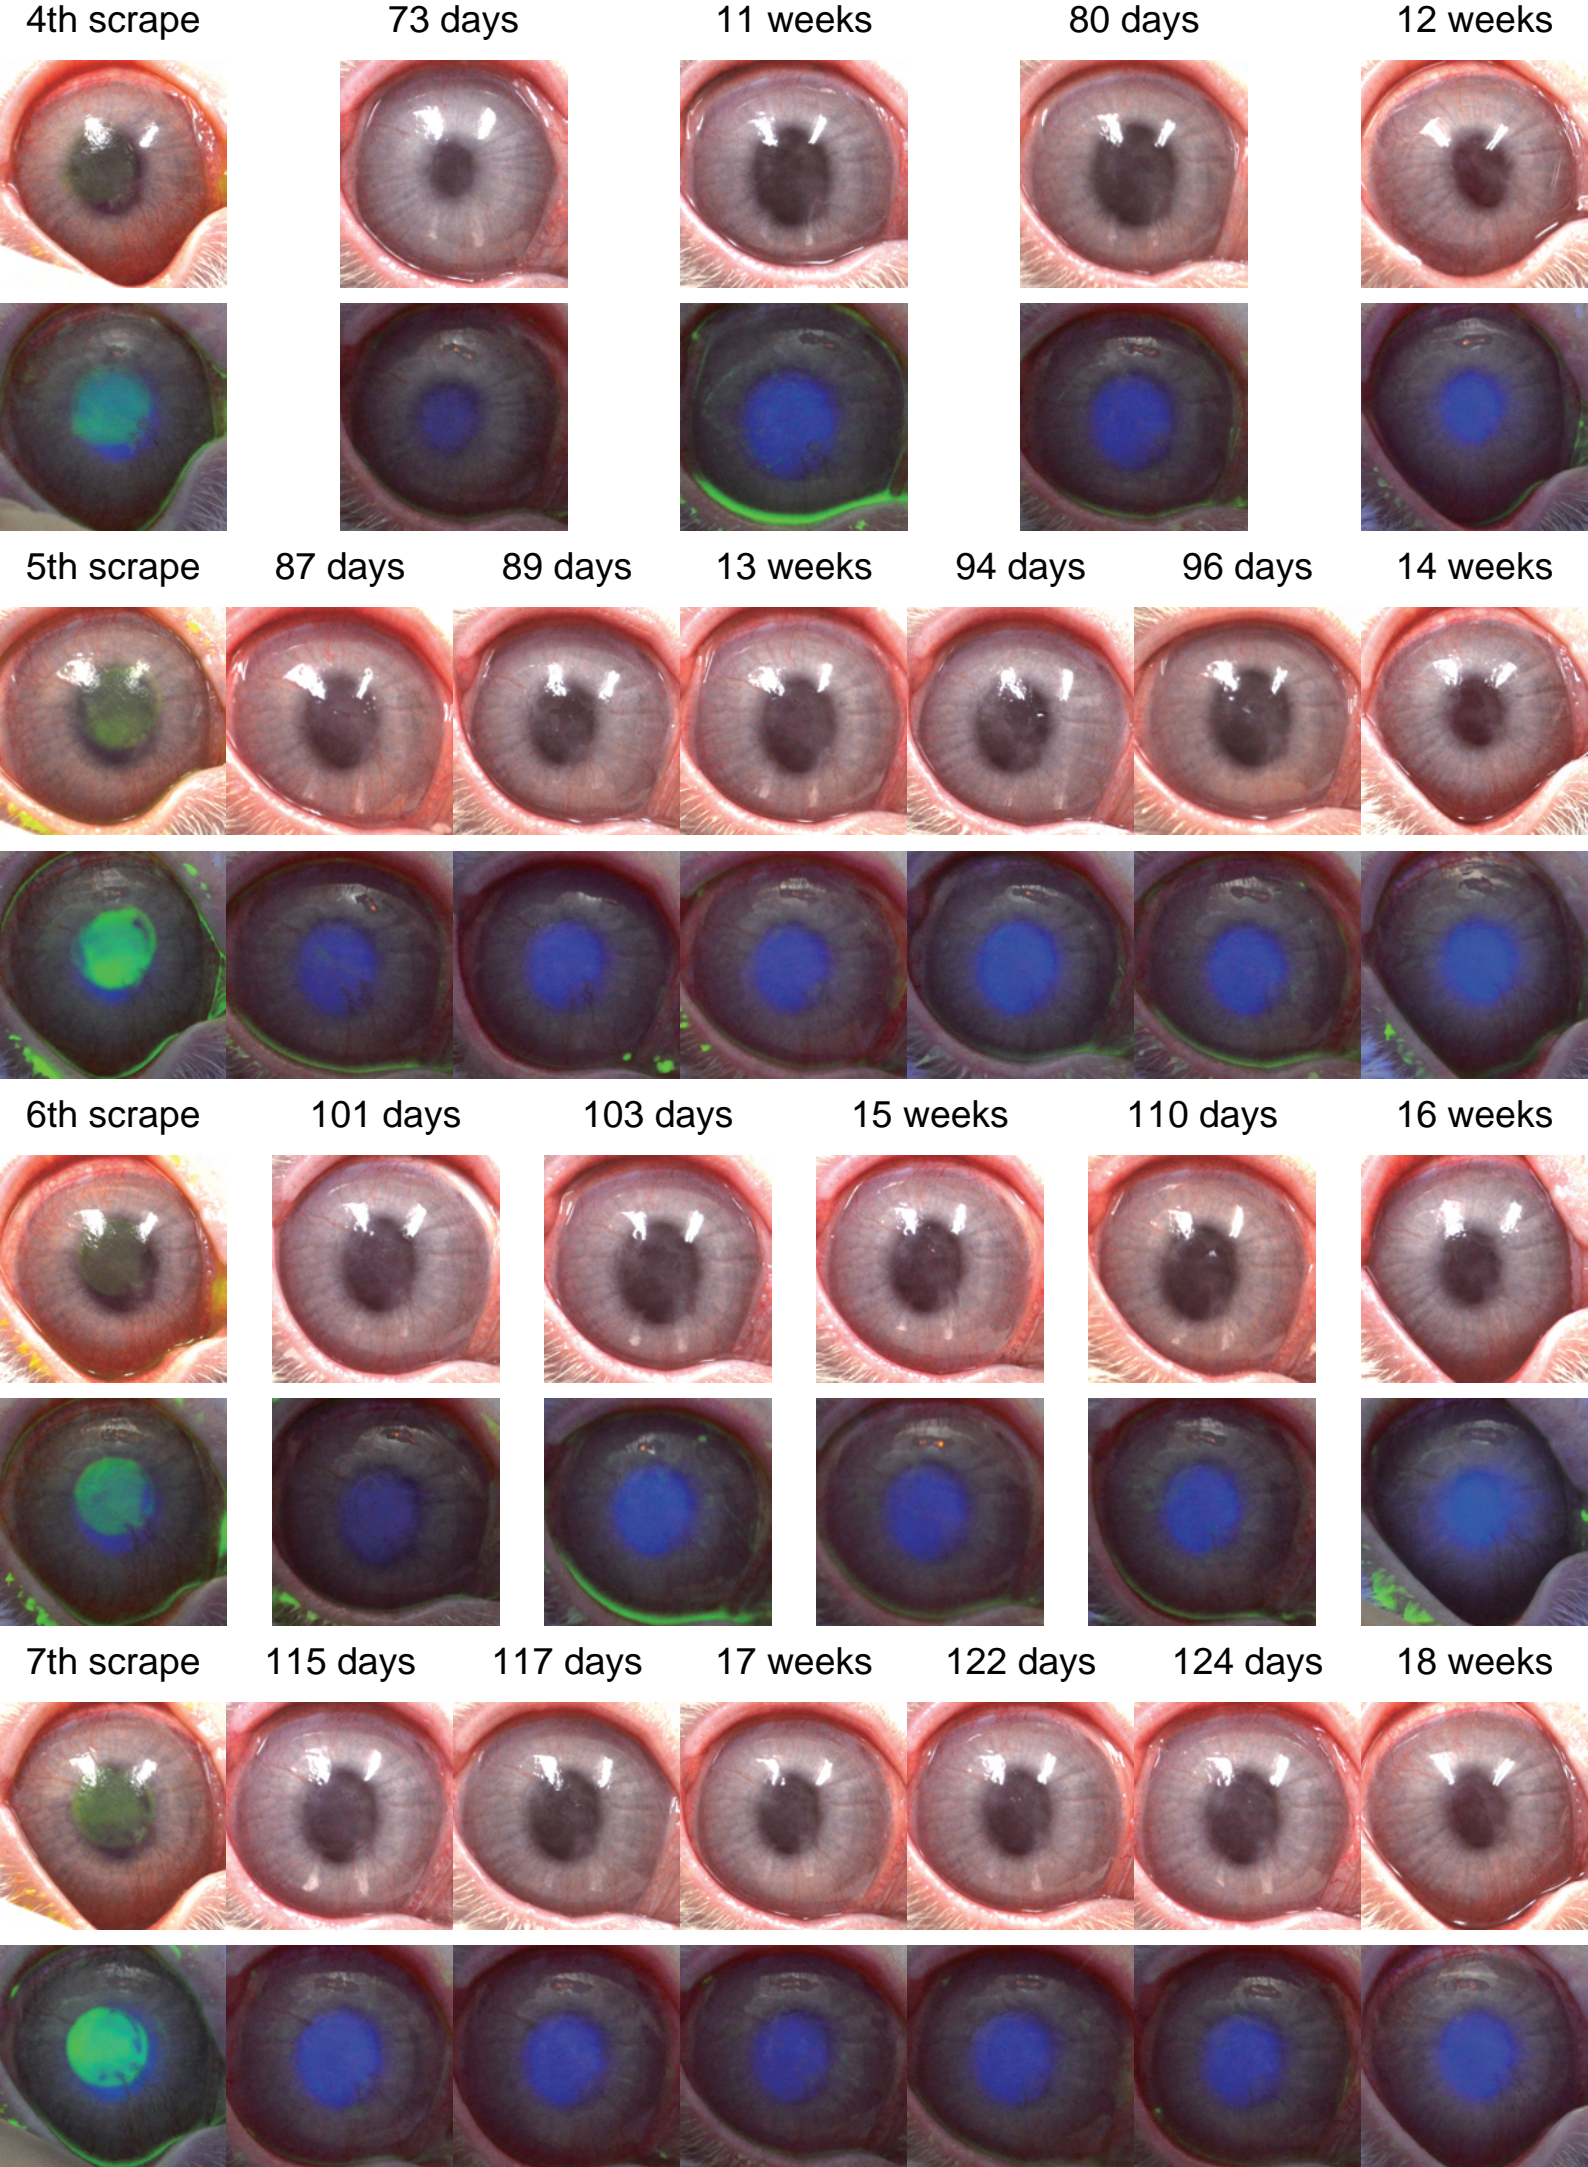

Figure S3B. Sugiyama, et al.



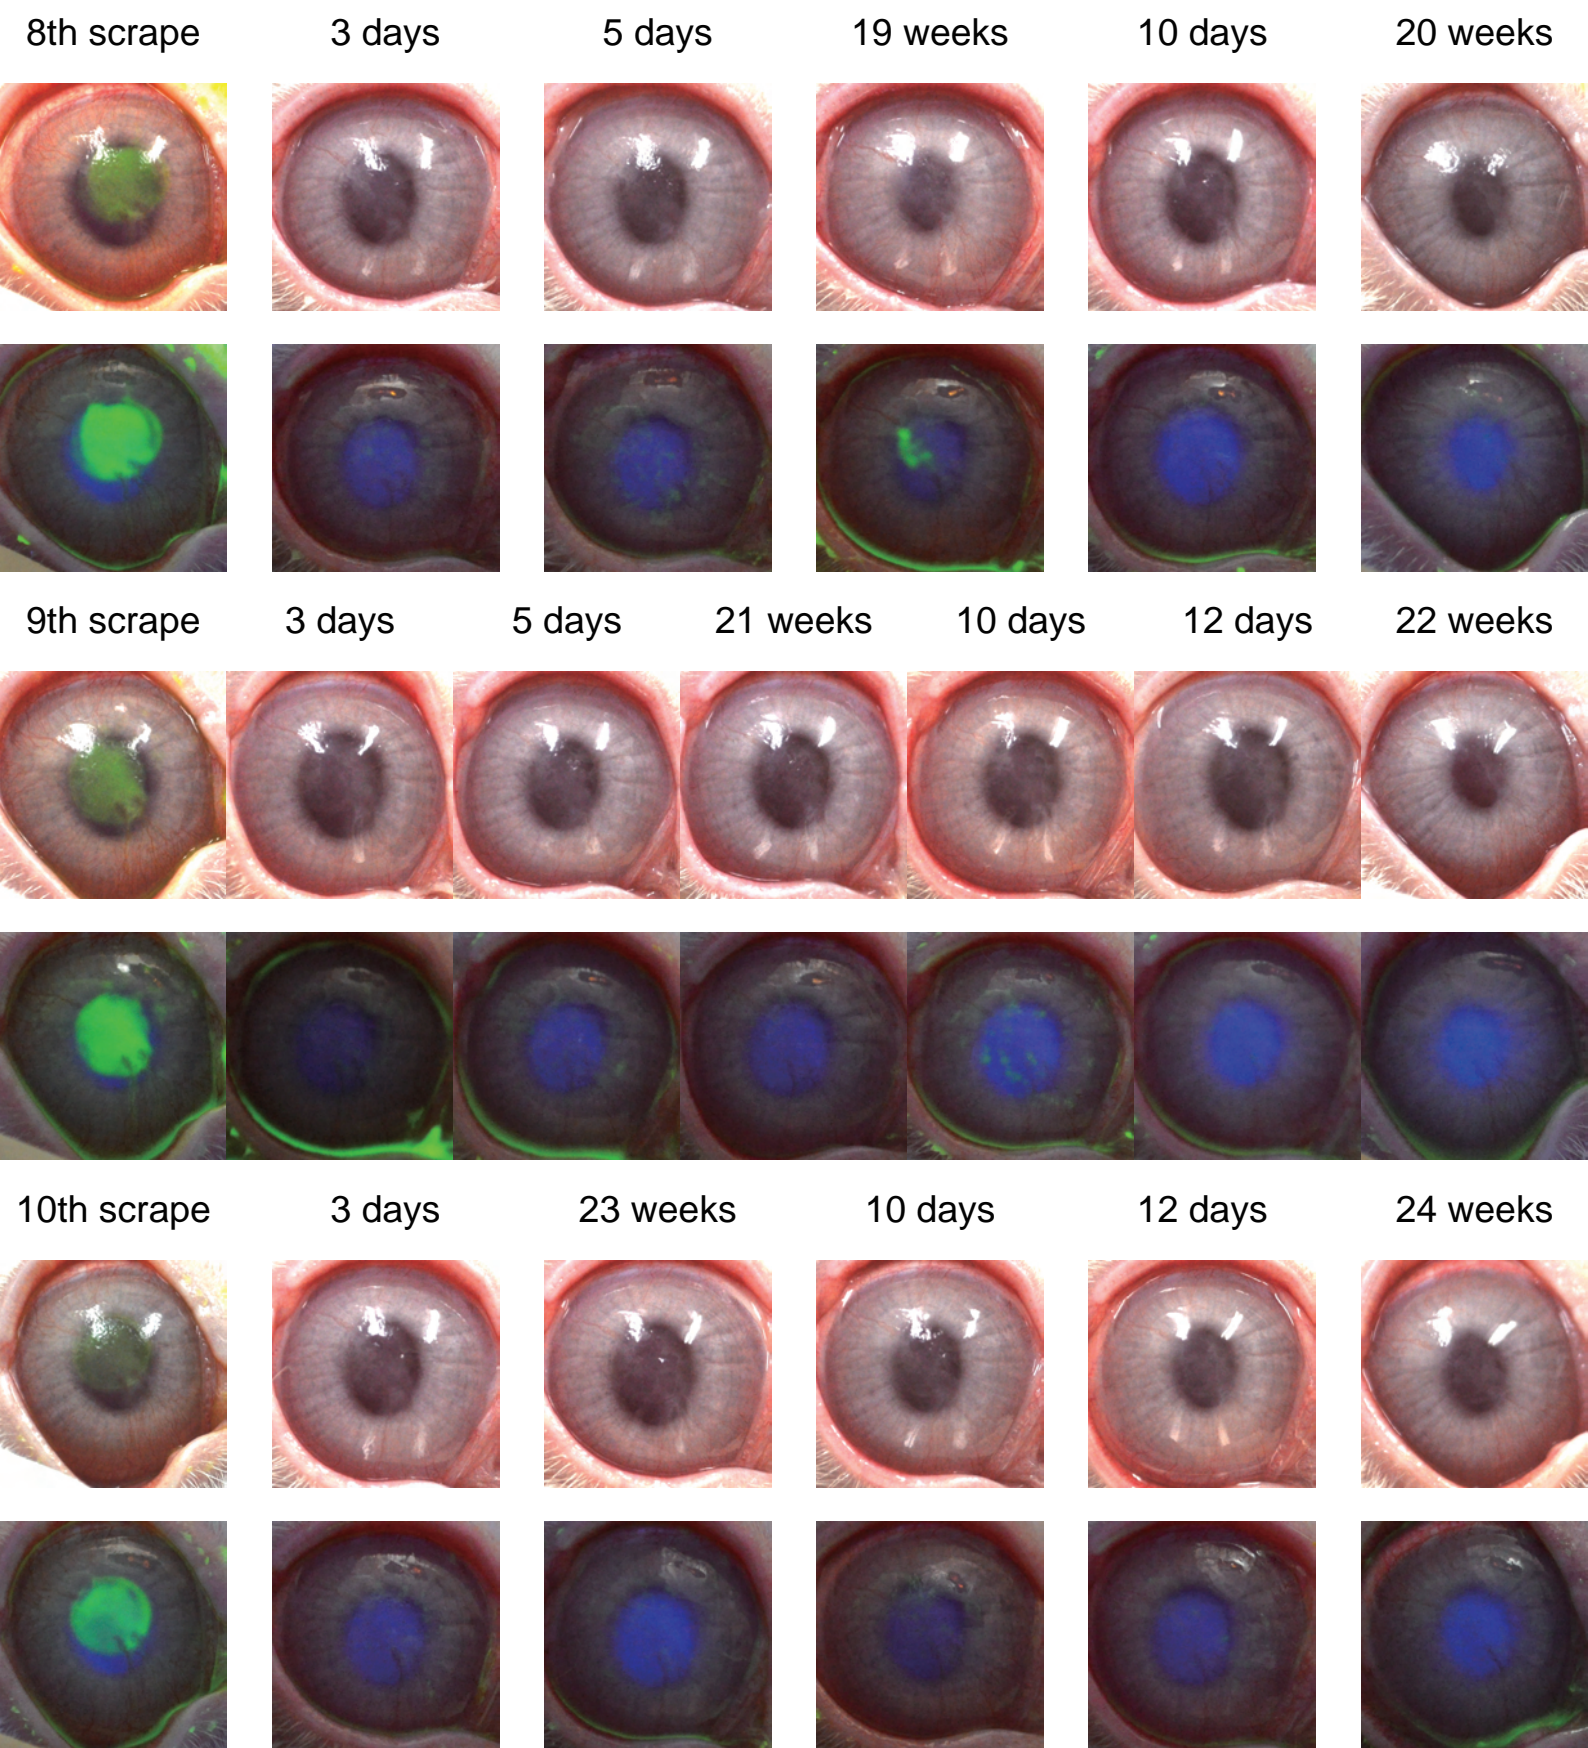

Figure S3C. Sugiyama, et al.

Supplement: mt201469x3.pdf [file mt201469x3.pdf]

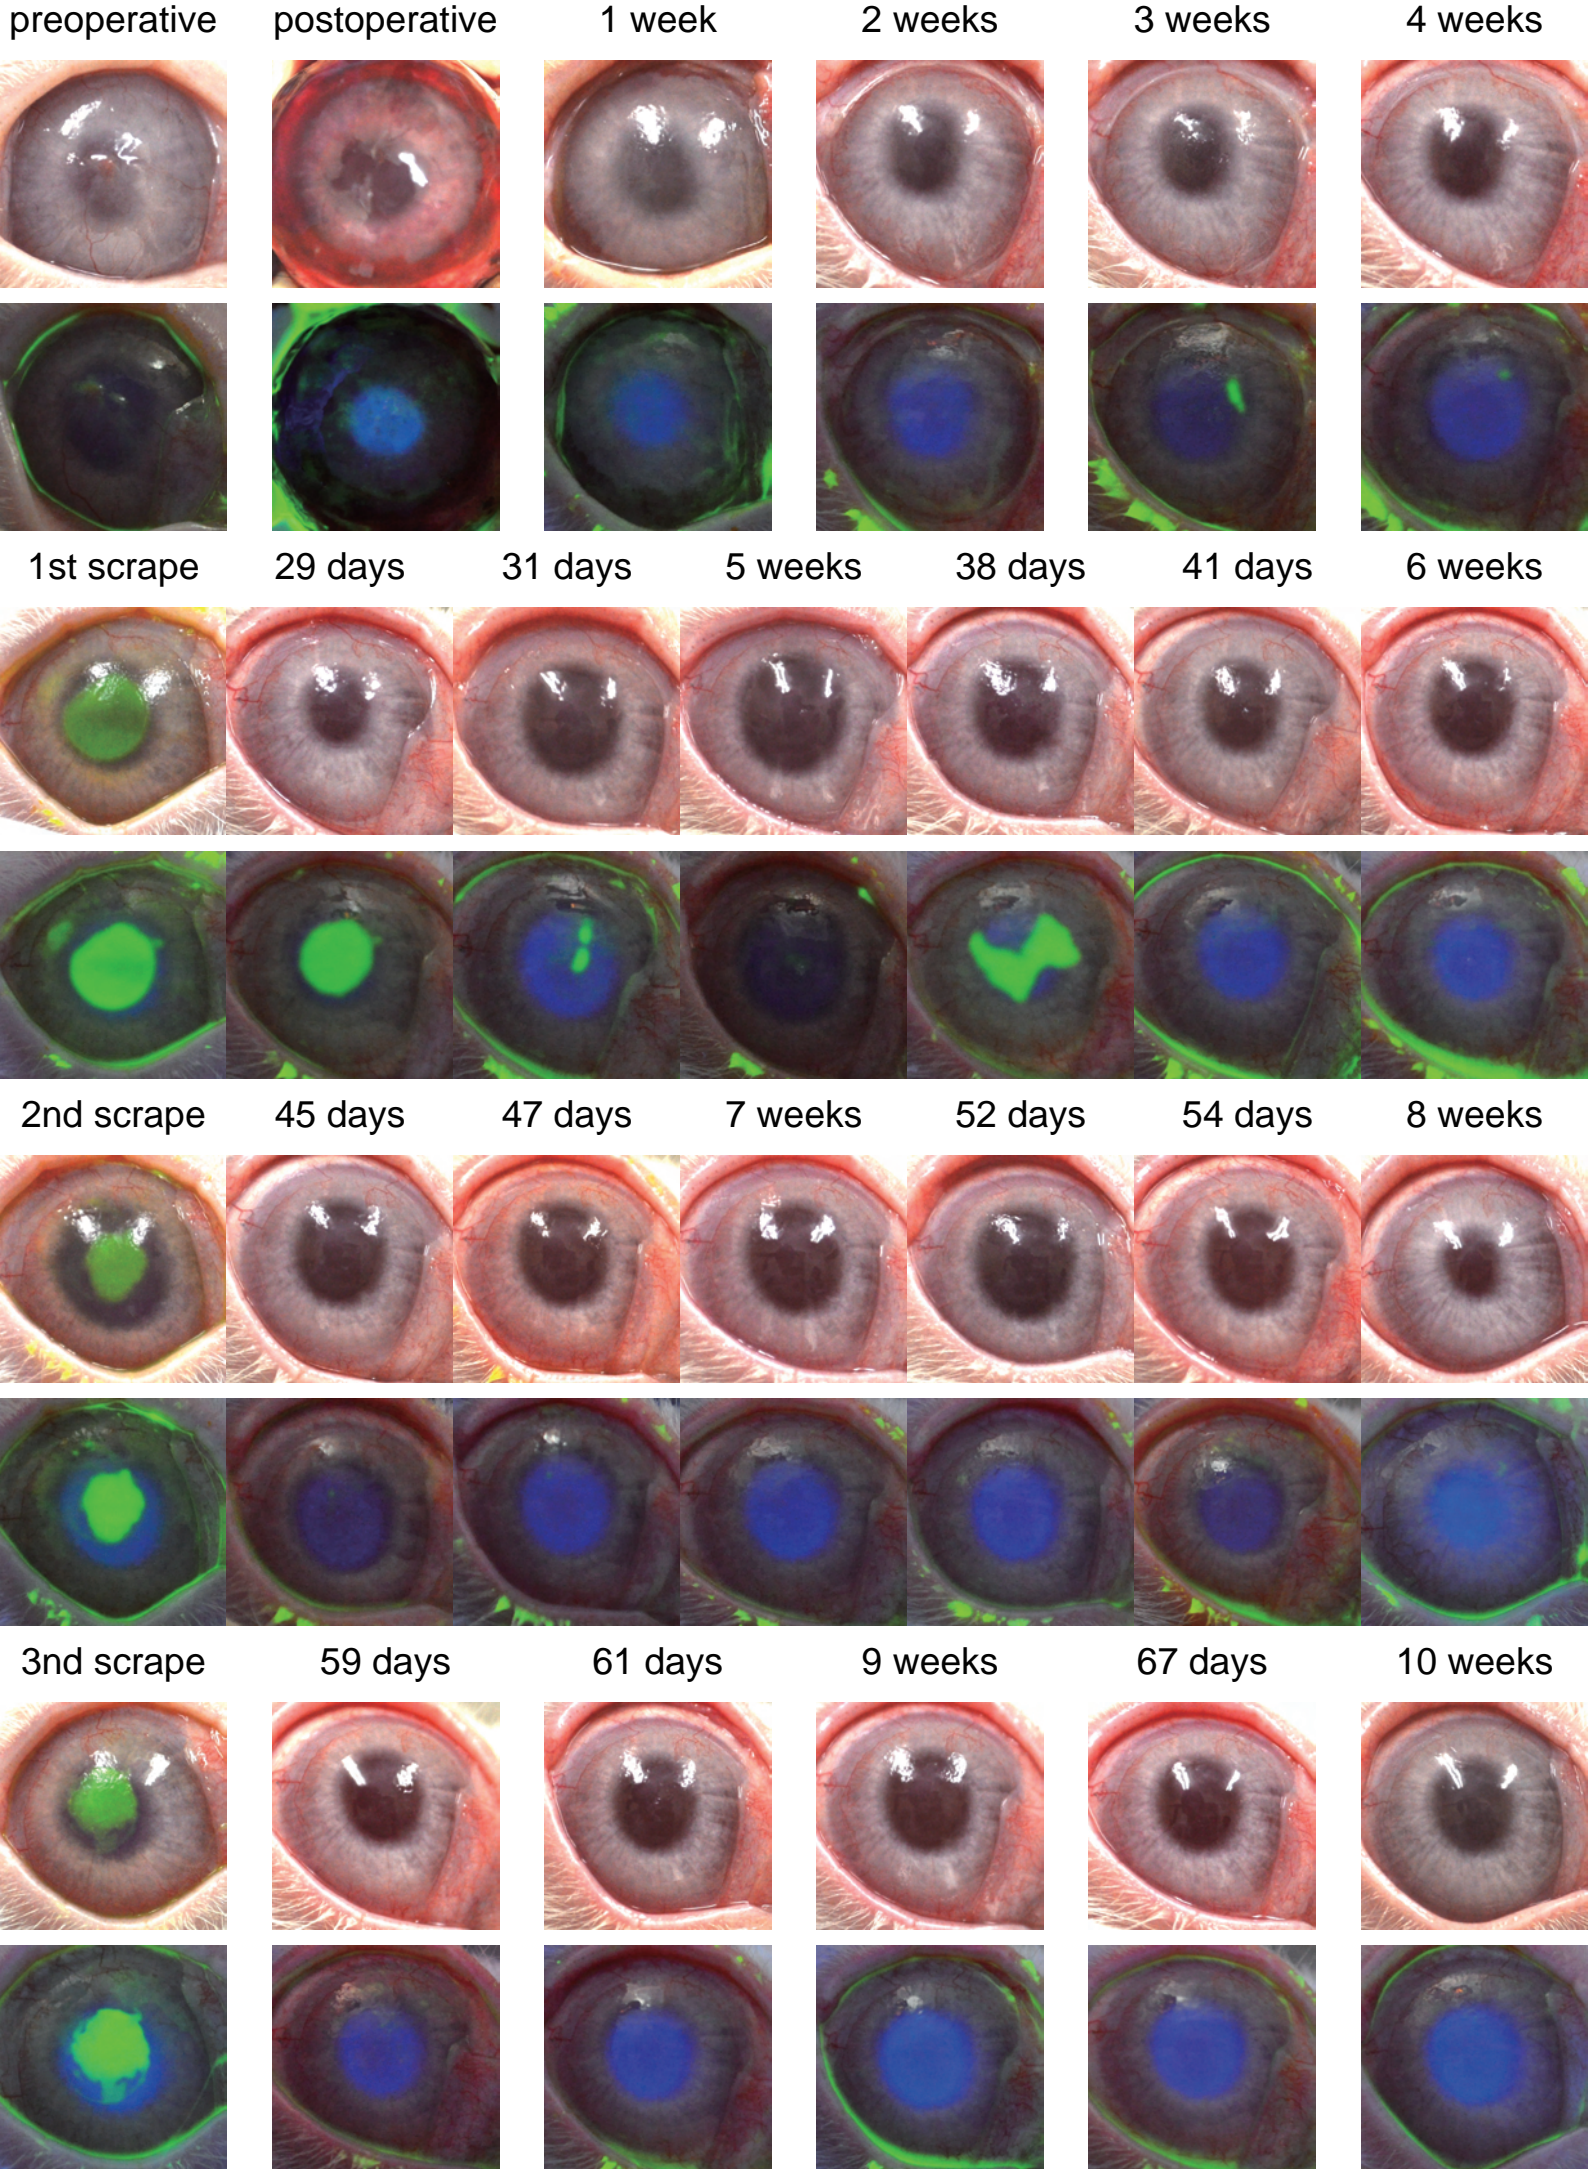

Figure S4A. Sugiyama, et al.



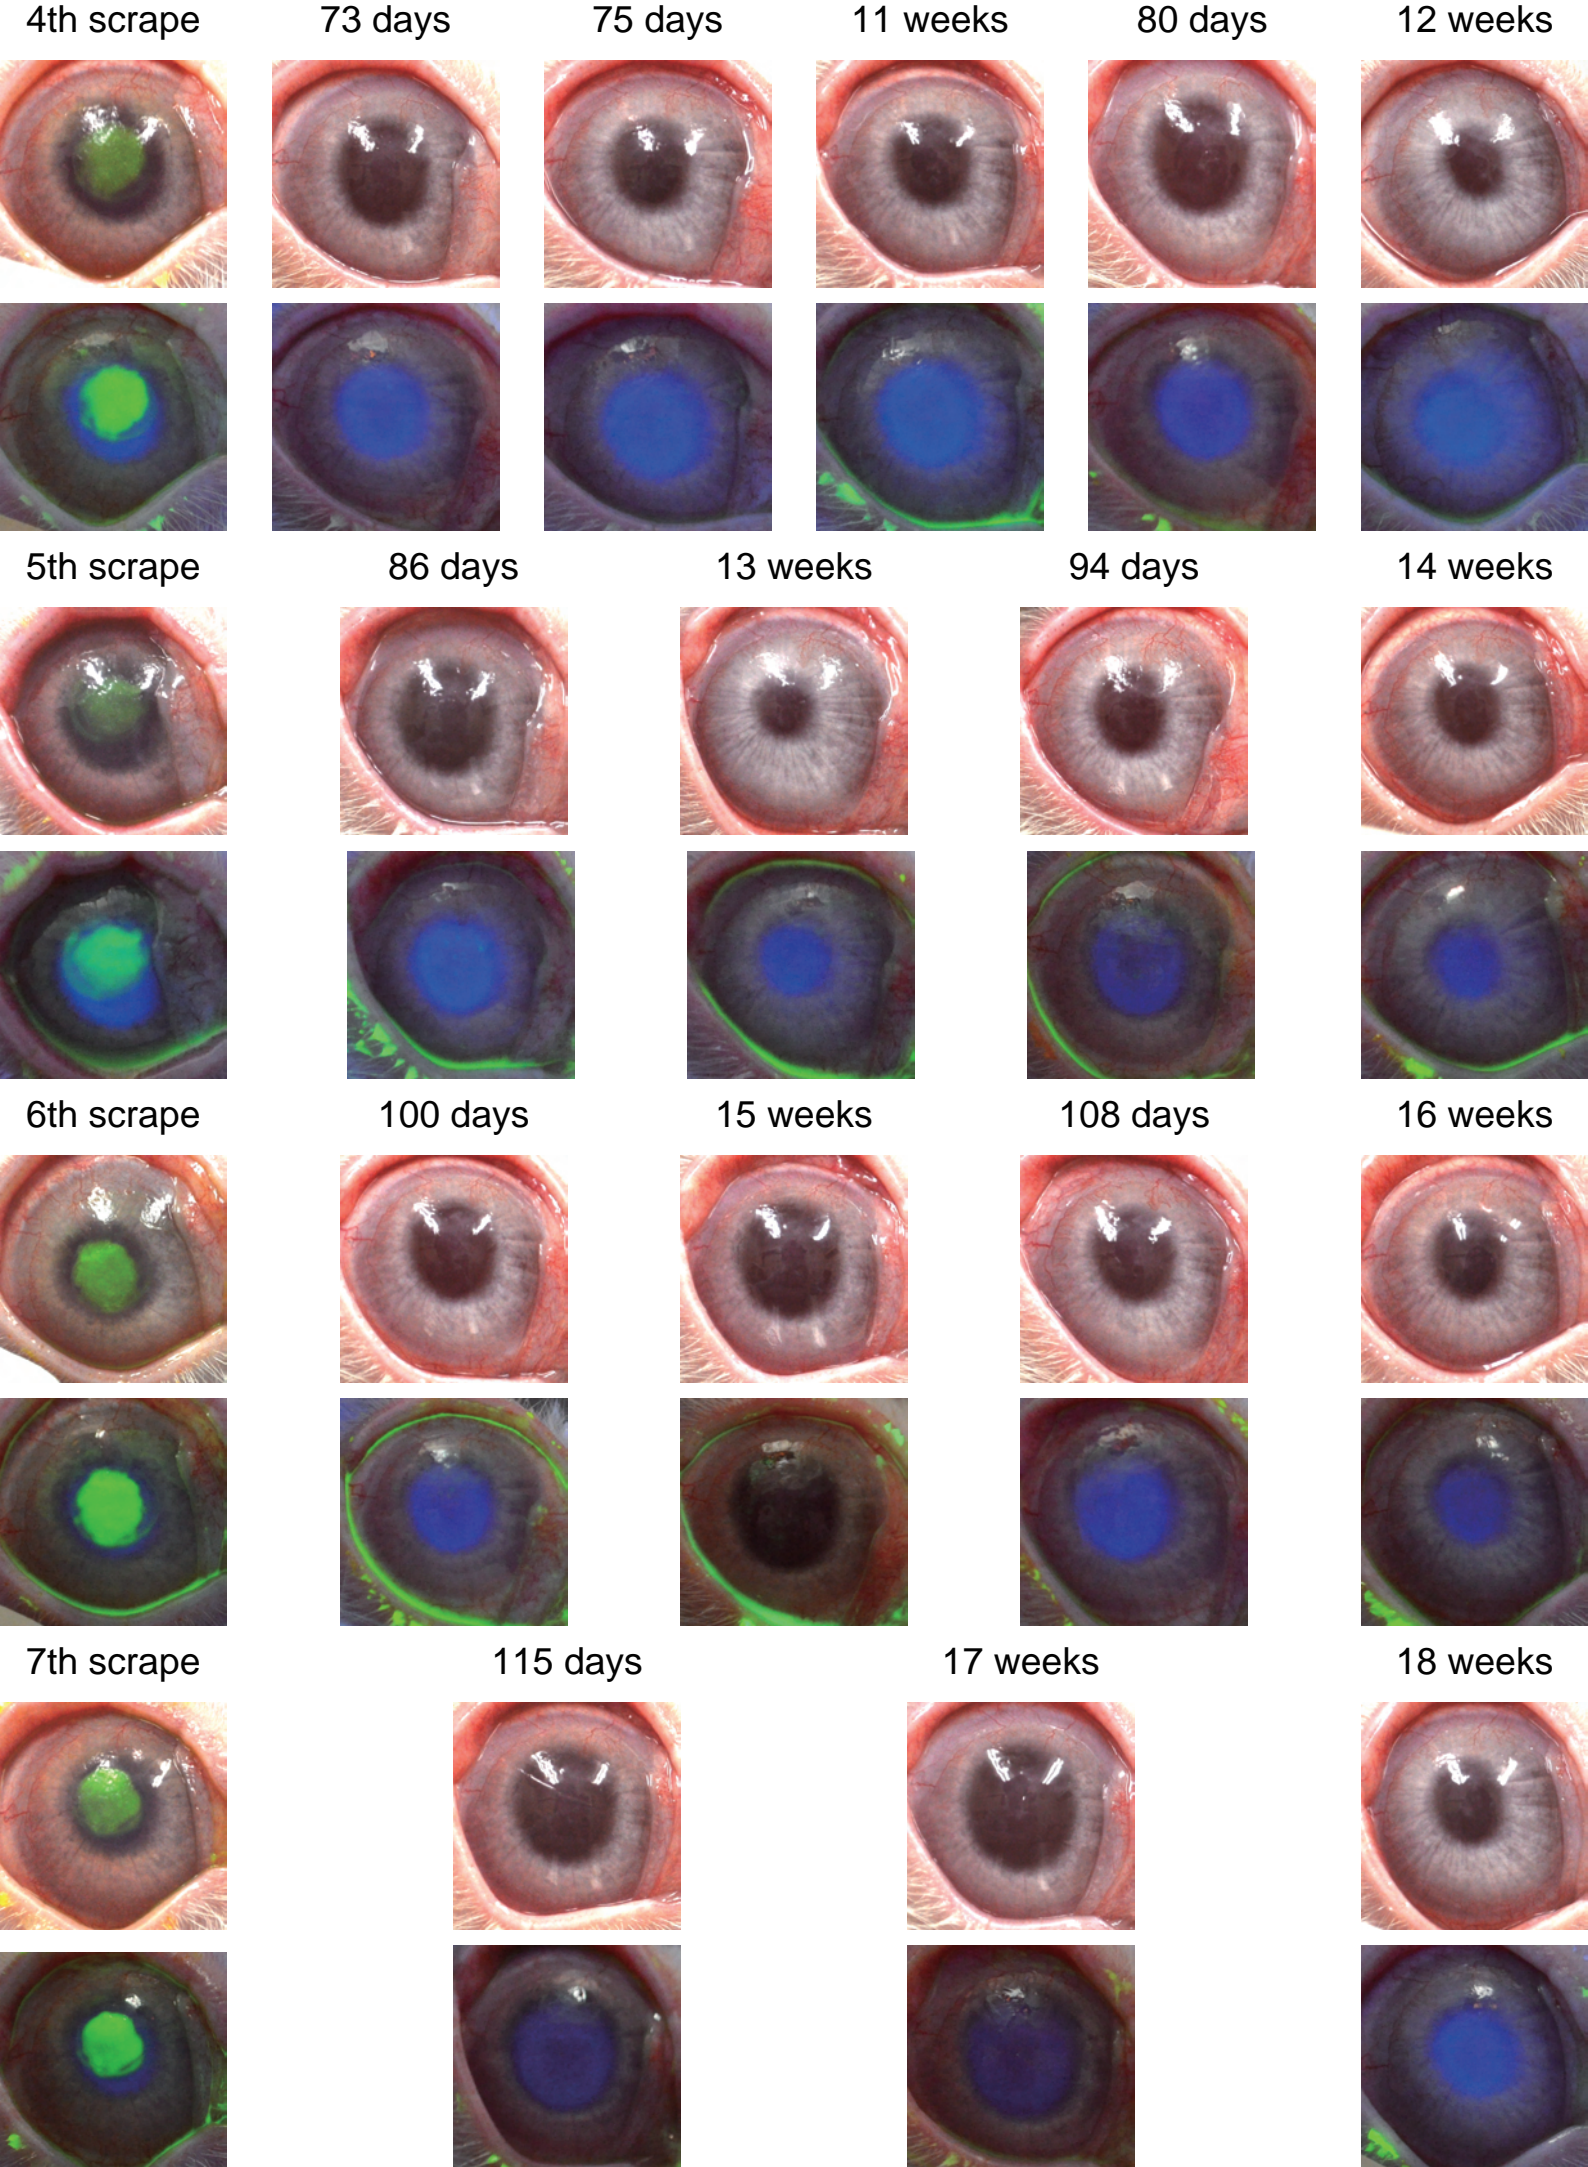

Figure S4B. Sugiyama, et al.



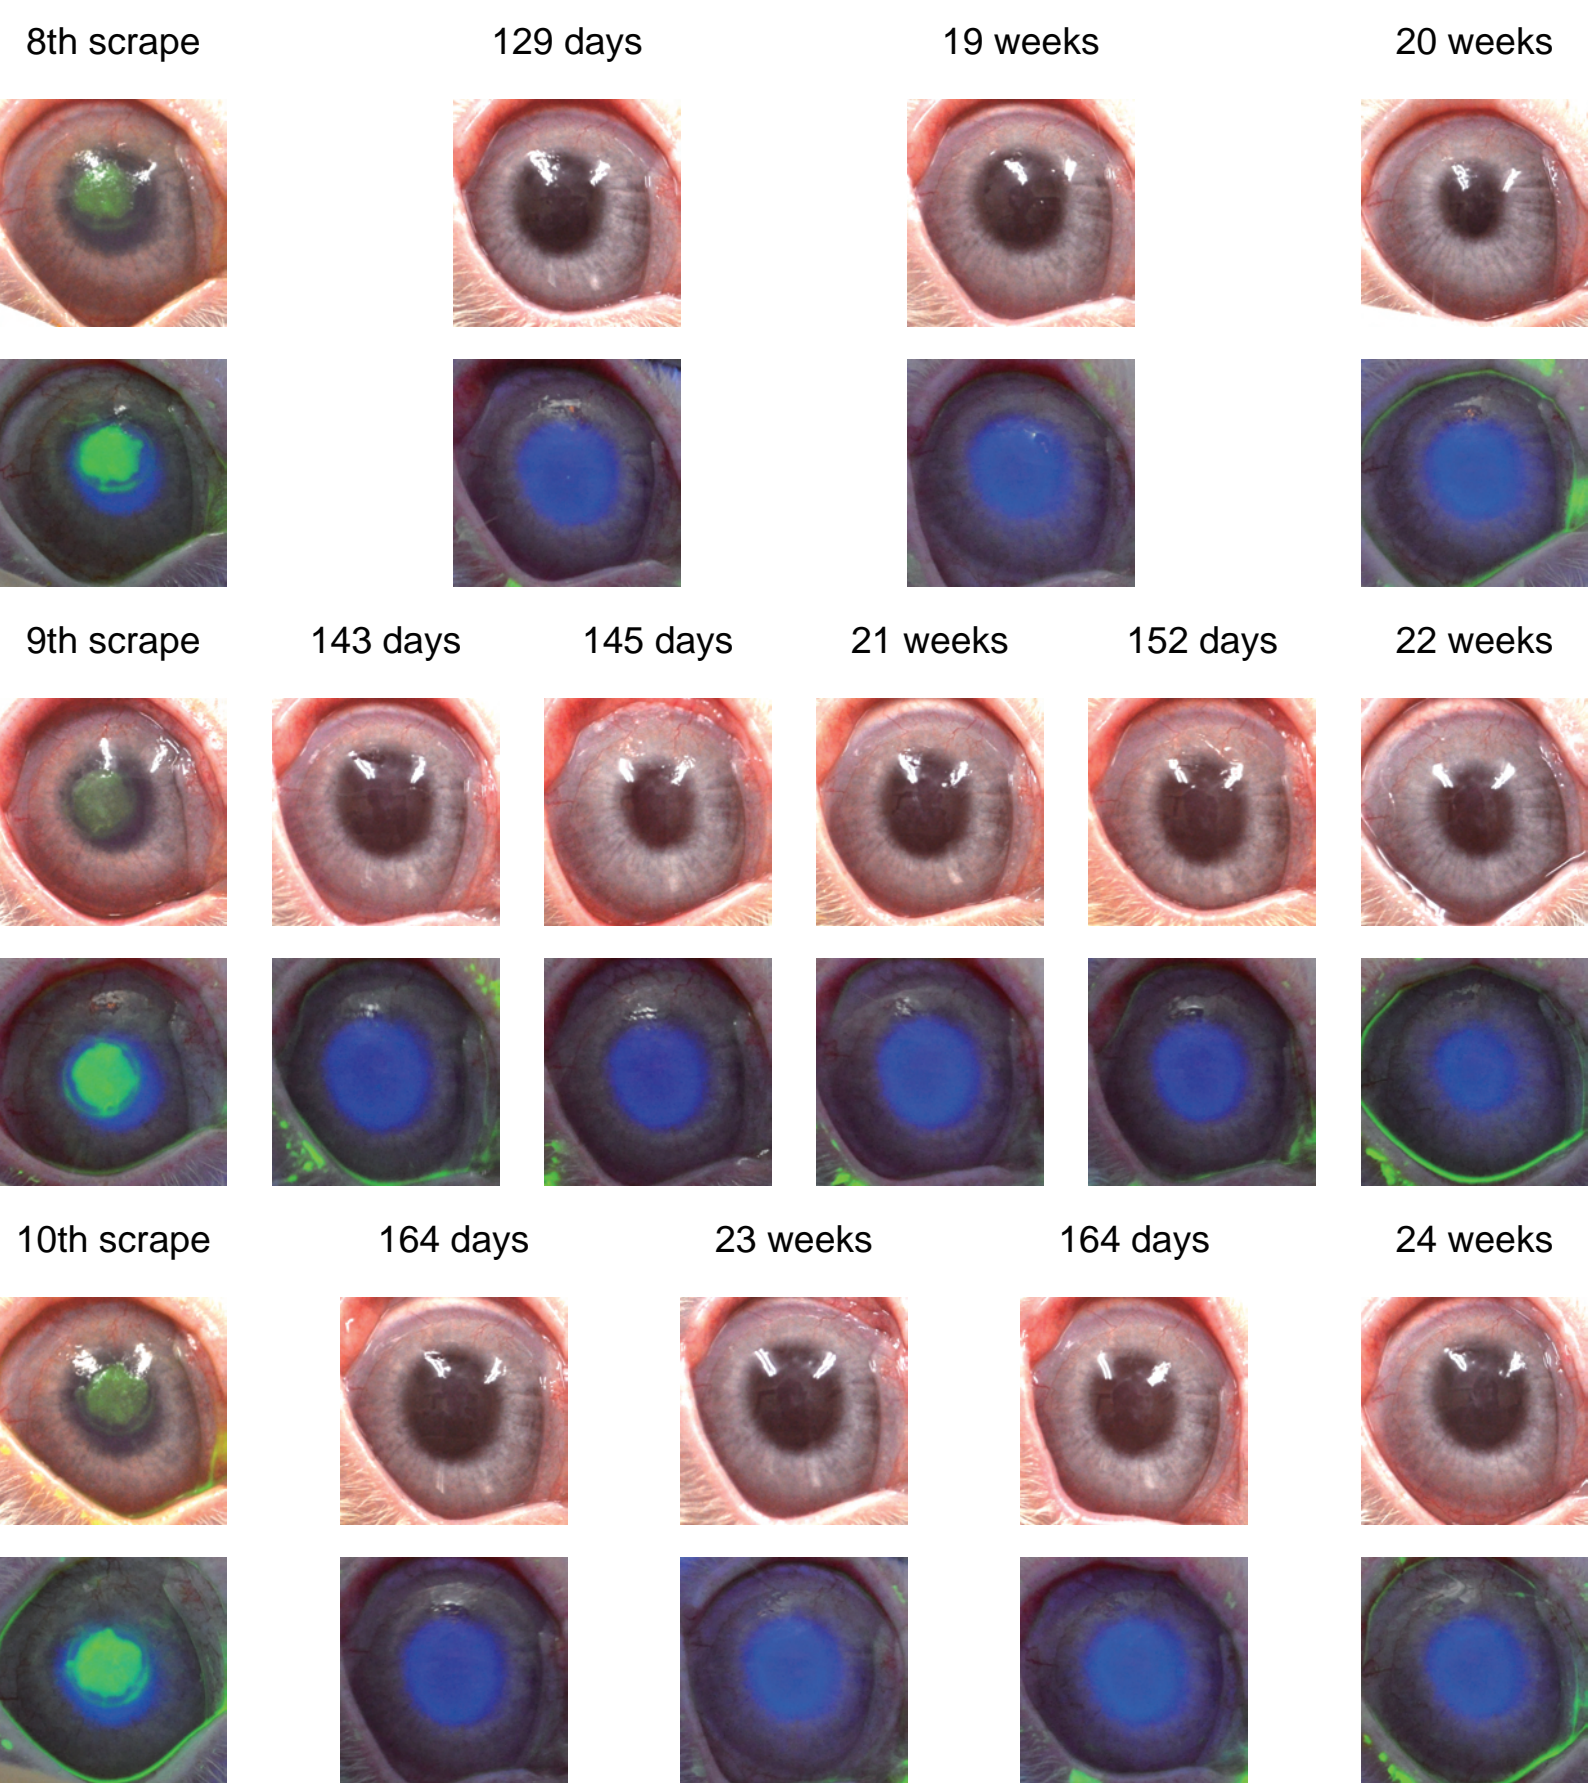

Figure S4C. Sugiyama, et al.

Supplement: mt201469x4.pdf [file mt201469x4.pdf]

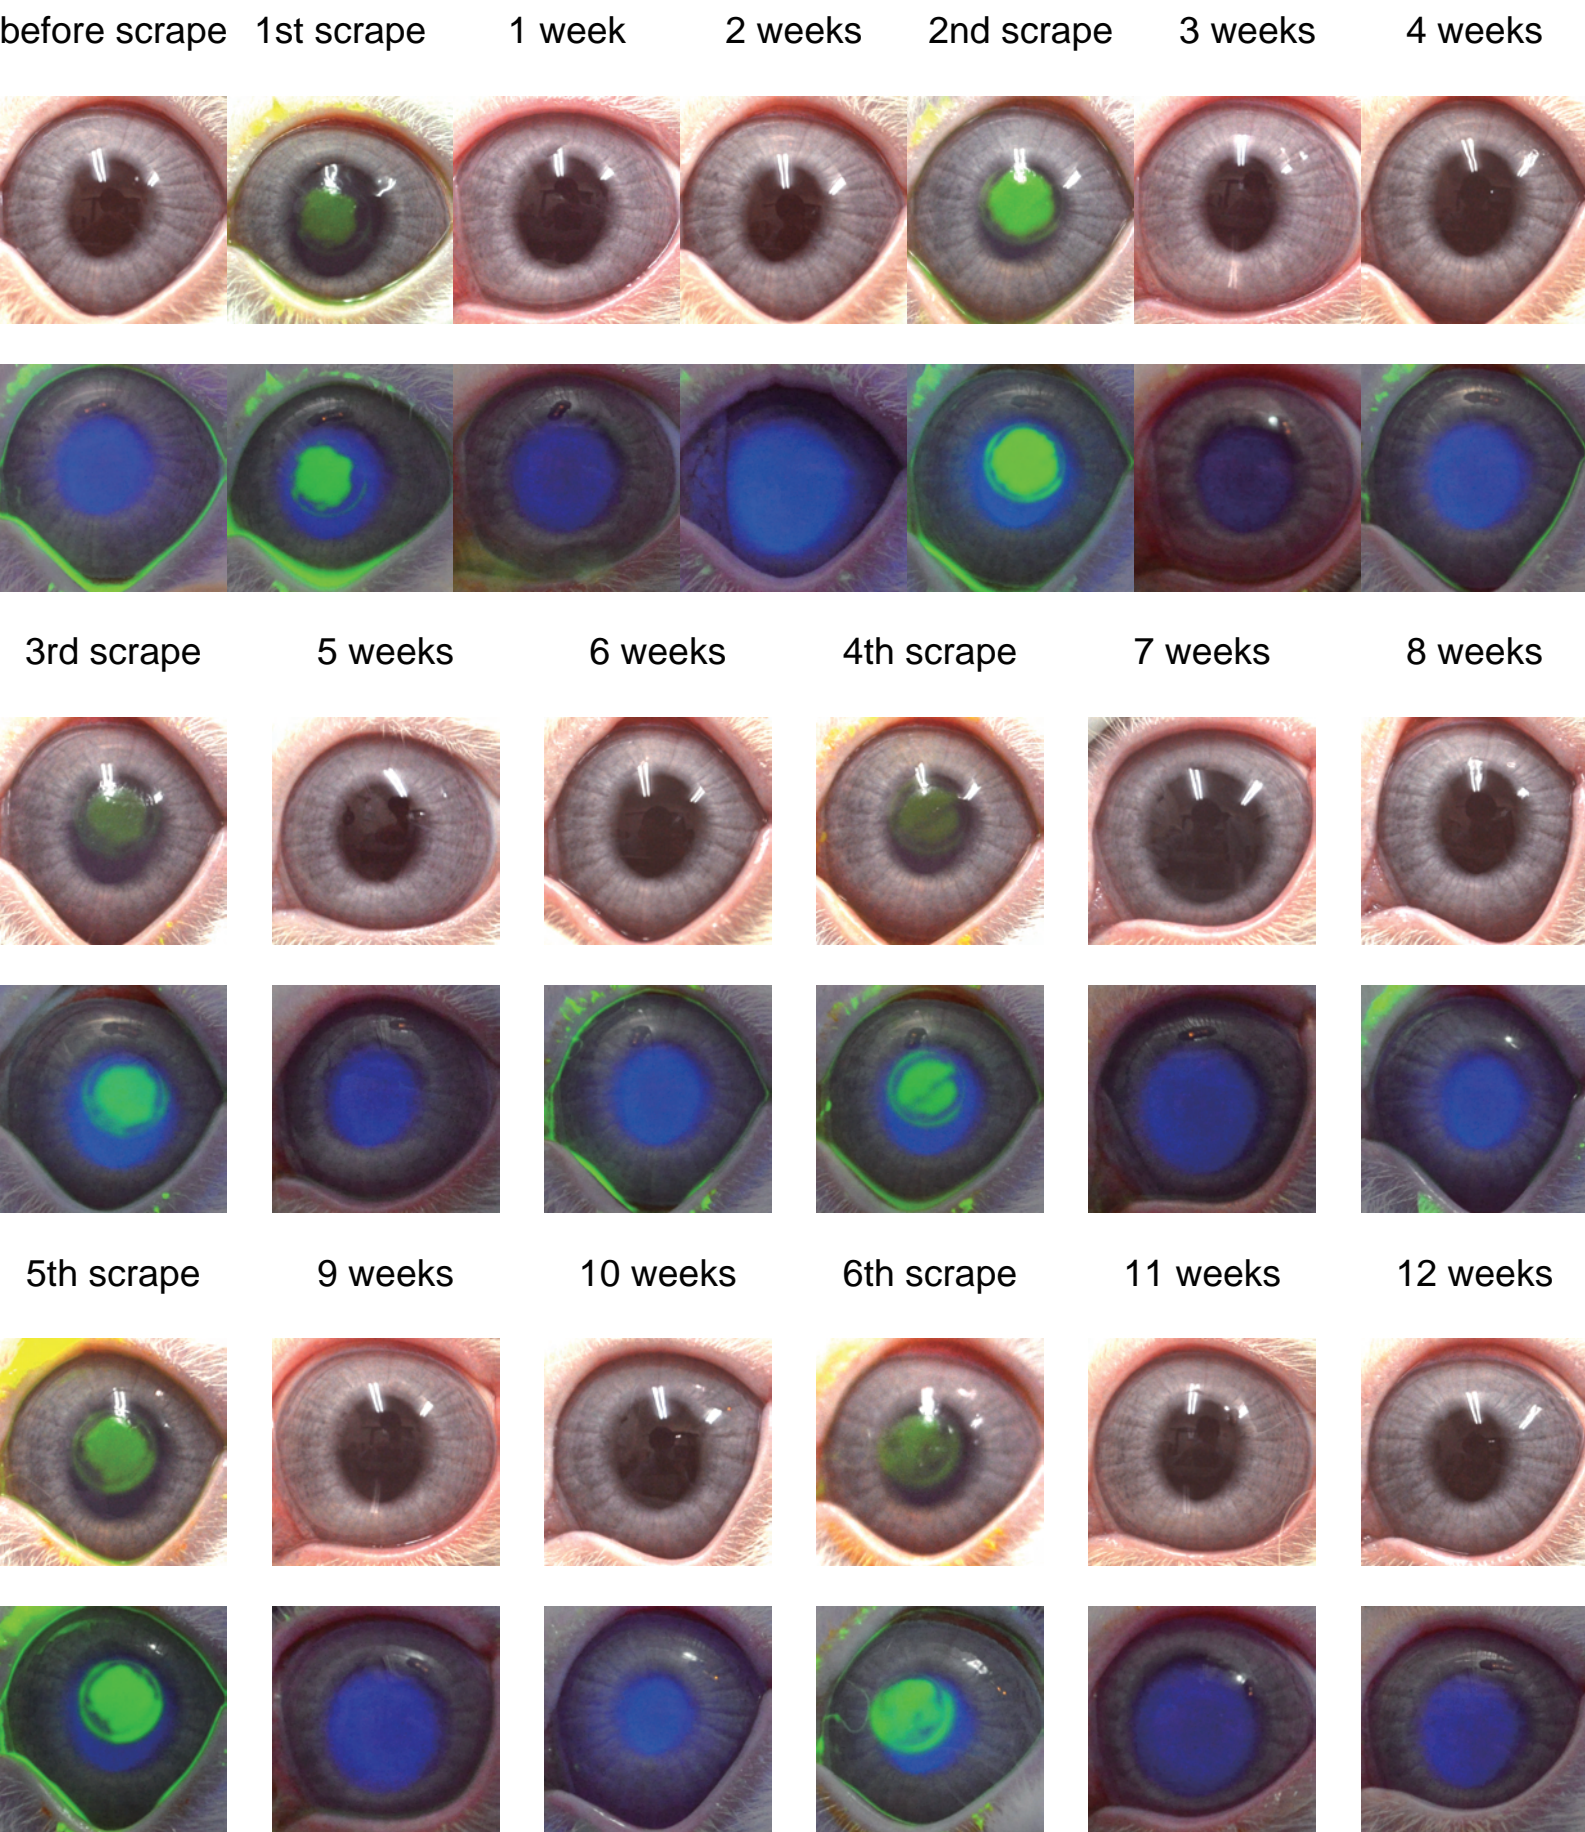

Figure S5A. Sugiyama, et al.



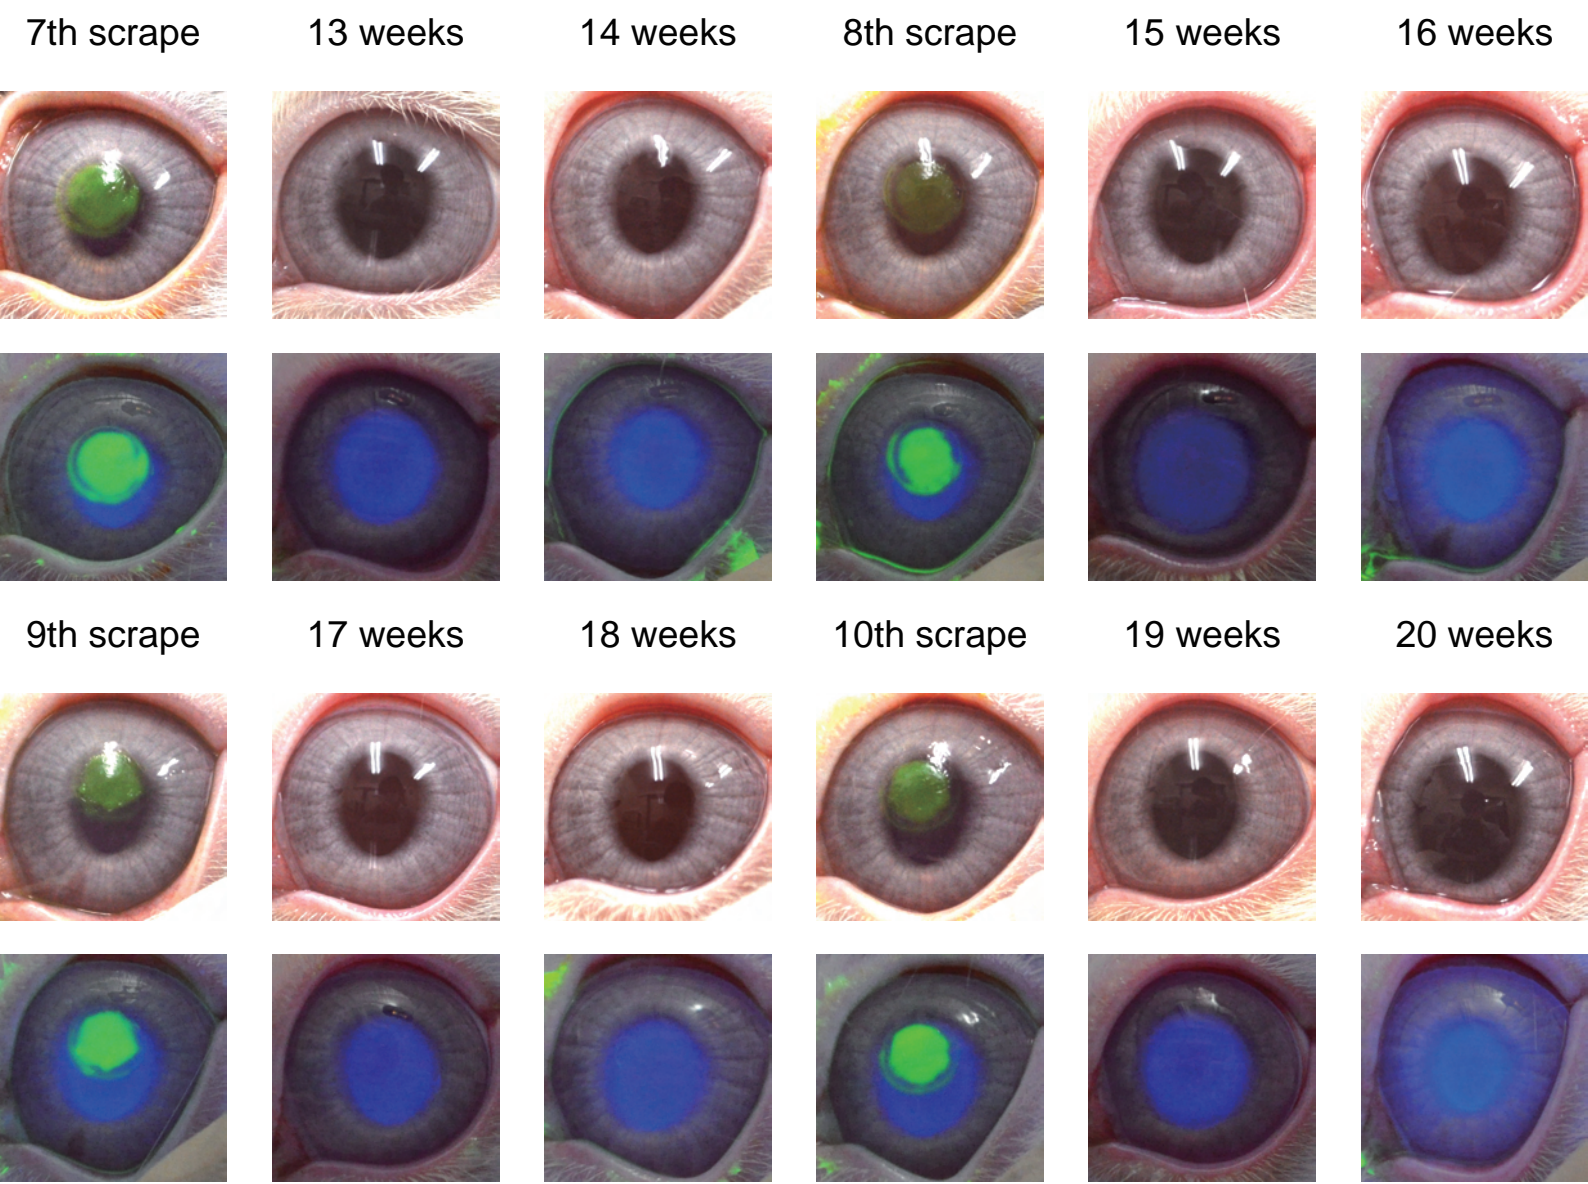

Figure S5B. Sugiyama, et al.

Supplement: mt201469x5.pdf [file mt201469x5.pdf]
